# Supplementary material for: A systematic screen for protein–lipid interactions in Saccharomyces cerevisiae
Source: PubMed Central journal article supplement — Mol Syst Biol. 2010 Nov 30;6:430. doi: 10.1038/msb.2010.87 (PMC3010107; doi:10.1038/msb.2010.87), 2010-11-30
Supplement: msb201087-s2.pdf [file msb201087-s2.pdf]

**Table S1A: List of lipids.**

In total, 56 lipids and non-physiological analogs were selected from the KEGG database (Kanehisa et al, 2008). The first column provides the lipid name and the second one the abbreviation used in the present study. The non-physiological lipids are labeled with an #. The lipid classification by metabolic pathway and the chemical classification reported in Lipid MAPS (Fahy et al, 2005) are given in columns three and four respectively. Lipid supplier is indicated in column five. When available, every arrayed lipid is identified with its KEGG ID and PUBCHEM compound ID in columns six and seven respectively. Alternatively, for lipid composed by more than one molecular specie (i.e. purified from natural sources) PUBCHEM substance ID is given in column seven. Column eighth lists the LogP value estimated for each lipid using the algorithm described by *Chenget al., 2007* (Cheng et al, 2007). Last column lists the overall charge calculated for each lipid using Marvin 5.2.3\_2 (ChemAxon, 2009). For those lipids composed of more than one molecular specie, a representative specie was chosen for the LogP and charge calculation. In this case, PUBCHEM compound ID is given in brackets.

| Names                                                      | Abbreviation used            | Metabolic pathway              | Chemical Family (Lipid MAPS) | Supplier            | KEGG ID | PUBCHEM      | LogP <sup>(Cheng et al, 2007)</sup> | Charge <sup>(ChemAxon, 2009)</sup> |
|------------------------------------------------------------|------------------------------|--------------------------------|------------------------------|---------------------|---------|--------------|-------------------------------------|------------------------------------|
| 1-Phosphatidyl-1D-myo-inositol 3-phosphate                 | PtdIns(3)P                   | Inositol phosphate metabolism  | Glycerophospholipid          | Matreya             | C04549  | CID 643964   | 9.1                                 | -2.97                              |
| 1-Phosphatidyl-1D-myo-inositol 4-phosphate                 | PtdIns(4)P                   | Inositol phosphate metabolism  | Glycerophospholipid          | Avanti Polar Lipids | C01277  | SID 4496     | (CID 643965) 9.1                    | -2.97                              |
| 1-Phosphatidyl-D-myo-inositol 4,5-bisphosphate             | PtdIns(4,5)P2                | Inositol phosphate metabolism  | Glycerophospholipid          | Avanti Polar Lipids | C04637  | SID 7226     | (CID 5497157) 8.3                   | -4.97                              |
| 1-Phosphatidyl-1D-myo-inositol 3,4,5-trisphosphate         | PtdIns(3,4,5)P3#             | Inositol phosphate metabolism  | Glycerophospholipid          | Axxora              | C05981  | CID 643963   | 6.9                                 | -6.95                              |
| 1-Phosphatidyl-D-myo-inositol                              | PtdIns                       | Glycerophospholipid metabolism | Glycerophospholipid          | Avanti Polar Lipids | C01194  | SID 4419     | (CID 194153) 10.2                   | -1.00                              |
| Phosphatidylserine                                         | PS                           | Glycerophospholipid metabolism | Glycerophospholipid          | Sigma               | C02737  | SID 5698     | (CID 9547078) 10.2                  | -1.06                              |
| Phosphatidylcholine                                        | PC                           | Glycerophospholipid metabolism | Glycerophospholipid          | Avanti Polar Lipids | C00157  | SID 3457     | (CID 5497103) 13.6                  | -1.00                              |
| Phosphatidylglycerol                                       | PG                           | Glycerophospholipid metabolism | Glycerophospholipid          | Sigma               | C00344  | SID 3637     | (CID 9547107) 12.3                  | -1.00                              |
| Phosphatidic acid                                          | PA                           | Glycerophospholipid metabolism | Glycerophospholipid          | Sigma               | C00416  | SID 3706     | (CID 5287505) 10.7                  | -1.96                              |
| Cardiolipin                                                |                              | Glycerophospholipid metabolism | Glycerophospholipid          | Sigma               | C05980  | SID 8259     | (CID 449005) 30.5                   | -2.00                              |
| Phosphatidylethanolamine                                   | PE                           | Glycerophospholipid metabolism | Glycerophospholipid          | Sigma               | C00350  | SID 3643     | (CID 5289131) 12.4                  | -0.01                              |
| Phosphatidyl-N-methylethanolamine                          | P-methylethanolamine         | Glycerophospholipid metabolism | Glycerophospholipid          | Sigma               | C01241  | CID 9547031  | 10.8                                | -0.01                              |
| Phosphatidyl-N-dimethylethanolamine                        | P-dimethylethanolamine       | Glycerophospholipid metabolism | Glycerophospholipid          | Sigma               | C04308  | CID 9547021  | 11.2                                | -0.10                              |
| Ethanolamine phosphate;<br>O-Phosphorylethanolamine        | Ethanolamine phosphate       | Glycerophospholipid metabolism | Additional Metabolite        | Sigma               | C00346  | CID 1015     | -4.8                                | -0.95                              |
| CDP-diacylglycerol                                         | CDP-DAG                      | Glycerophospholipid metabolism | Glycerophospholipid          | Avanti Polar Lipids | C00269  | CID 24779568 | 10                                  | -2.00                              |
| CDP-choline                                                | CDP-C                        | Glycerophospholipid metabolism | Additional Metabolite        | Sigma               | C00307  | CID 13804    | -4                                  | -2.00                              |
| CDPethanolamine                                            | CDP-E                        | Glycerophospholipid metabolism | Additional Metabolite        | Sigma               | C00570  | CID 123727   | -7.2                                | -1.01                              |
| 3-ketodihydrosphingosine                                   | 3-ketodihydrosphingosine     | Sphingolipid metabolism        | Sphingolipid                 | Matreya             | C02934  | CID 631      | 5.7                                 | 0.58                               |
| Dihydrosphingosine;<br>Sphinganine                         | DHS                          | Sphingolipid metabolism        | Sphingolipid                 | Sigma               | C00836  | CID 91486    | 5.8                                 | 0.99                               |
| Phytosphingosine                                           | Phytosphingosine             | Sphingolipid metabolism        | Sphingolipid                 | Avanti Polar Lipids | C12144  | CID 122121   | 4.6                                 | 0.97                               |
| Sphingosine                                                | Sphingosine#                 | Sphingolipid metabolism        | Sphingolipid                 | Avanti Polar Lipids | C00319  | CID 6604741  | 5.3                                 | 0.99                               |
| Dihydrosphingosine-1-phosphate;<br>Sphinganine-1-phosphate | DHS-1P                       | Sphingolipid metabolism        | Sphingolipid                 | Avanti Polar Lipids | C01120  | CID 644260   | 2.4                                 | -0.96                              |
| Phytosphingosine-1-phosphate                               | Phytosphingosine-1P          | Sphingolipid metabolism        | Sphingolipid                 | Avanti Polar Lipids | -       | CID 10883829 | 1.3                                 | -0.99                              |
| Sphingosine 1-phosphate                                    | Sphingosine-1P#              | Sphingolipid metabolism        | Sphingolipid                 | Avanti Polar Lipids | C06124  | CID 5283560  | 1.9                                 | -0.96                              |
| Dihydroceramide;<br>N-acylsphinganine                      | Dihydroceramide              | Sphingolipid metabolism        | Sphingolipid                 | Avanti Polar Lipids | C12126  | CID 2510     | 9                                   | 0.00                               |
| N-Acyl-Phytosphingosine C8                                 | Phytoceramide C8             | Sphingolipid metabolism        | Sphingolipid                 | Matreya             | C12145  | CID 9803493  | 7.9                                 | 0.00                               |
| N-Acyl-Phytosphingosine C18                                | Phytoceramide C18            | Sphingolipid metabolism        | Sphingolipid                 | Avanti Polar Lipids | C12145  | CID 10303767 | 13.3                                | 0.00                               |
| Ceramide;<br>N-acylsphingosine                             | Ceramide#                    | Sphingolipid metabolism        | Sphingolipid                 | Matreya             | C00195  | SID 3495     | (CID 5283565) 13.9                  | 0.00                               |
| CoA                                                        | CoA                          | Fatty acid metabolism          | Additional Metabolite        | Sigma               | C00010  | CID 6816     | -5.8                                | -3.98                              |
| Acetyl-CoA                                                 | Acetyl-CoA                   | Fatty acid metabolism          | Fatty acyl                   | Sigma               | C00024  | CID 6302     | -5.6                                | -3.98                              |
| Acetoacetyl-CoA                                            | Acetoacetyl-CoA              | Fatty acid metabolism          | Fatty acyl                   | Sigma               | C00332  | CID 439214   | -5.8                                | -3.98                              |
| (S)-3-Hydroxy-3-methylglutaryl-CoA                         | 3-OH-3methylglutaryl-CoA     | Fatty acid metabolism          | Fatty acyl                   | Sigma               | C00356  | CID 439218   | -6.6                                | -4.98                              |
| Palmitoyl-CoA                                              | Palmitoyl-CoA                | Fatty acid metabolism          | Fatty acyl                   | Avanti Polar Lipids | C00040  | CID 644109   | 1.7                                 | -3.98                              |
| (3S)-3-Hydroxystearoyl-CoA                                 | α-Ohstearoyl-CoA#            | Fatty acid metabolism          | Fatty acyl                   | Avanti Polar Lipids | C00640  | CID 193774   | 2                                   | -3.98                              |
| L-serine                                                   | L-serine                     | Fatty acid metabolism          | Fatty acyl                   | Sigma               | C00065  | CID 5951     | -3.1                                | -0.03                              |
| Hexadecanoic acid                                          | Hexadecanoic                 | Fatty acid metabolism          | Fatty acyl                   | Sigma               | C00249  | CID 985      | 6.4                                 | -1.00                              |
| (9Z)-Octadecenoic acid                                     | 9Z-octadecanoic              | Fatty acid metabolism          | Fatty acyl                   | Sigma               | C00712  | CID 445639   | 6.5                                 | -1.00                              |
| (9Z,12Z)-Octadecadienoic acid                              | 9Z,12Z-octadecanoic          | Fatty acid metabolism          | Fatty acyl                   | Sigma               | C01595  | CID 5280450  | 6.8                                 | -1.00                              |
| 15(S)-HETE                                                 | 15s-HETE                     | Fatty acid metabolism          | Fatty acyl                   | Sigma               | C04742  | CID 5280724  | 5.1                                 | -1.00                              |
| Acylglycerol                                               | MAG                          | Glycerolipid metabolism        | Glycerolipid                 | Sigma               | C01885  | CID 24699    | 7.4                                 | 0.00                               |
| 1,2-Diacyl-sn-glycerol                                     | DAG                          | Glycerolipid metabolism        | Glycerolipid                 | Avanti Polar Lipids | C00641  | CID 99931    | 14                                  | 0.00                               |
| Triacylglycerol                                            | TAG                          | Glycerolipid metabolism        | Glycerolipid                 | Sigma               | C00422  | CID 69310    | 12.2                                | 0.00                               |
| 1,2-Diacyl-3-beta-D-galactosyl-sn-glycerol                 | 1,2-DA-3β-galactosylglycerol | Glycerolipid metabolism        | Glycerolipid                 | Sigma               | C03692  | SID 6466     | (CID 193820) 14.6                   | 0.00                               |
| Digalactosyl-diacylglycerol                                | Digalactosyl-DAG             | Glycerolipid metabolism        | Glycerolipid                 | Sigma               | C06037  | SID 8309     | (CID 4629344) 12.5                  | 0.00                               |
| Diacylglycerol pyrophosphate                               | DAG-PyroP                    | Glycerolipid metabolism        | Glycerophospholipid          | Sigma               | -       | CID 10051843 | 3.2                                 | -2.79                              |
| 1-Alkyl-2-acetyl-sn-glycero-3-phosphocholine               | 1alkyl-2acetylglycero-3PC    | Glycerolipid metabolism        | Glycerophospholipid          | Sigma               | C04598  | SID 24898858 | (CID 2499) 6.5                      | -1.00                              |
| 1-Acyl-sn-glycerol 3-phosphate                             | 1acyl-sn-glycerol-3P         | Glycerolipid metabolism        | Glycerophospholipid          | Axxora              | C00681  | CID 89566    | 5                                   | -1.94                              |
| Geranyl diphosphate                                        | GeranylPP                    | Sterol and prenol metabolism   | Prenol Lipids                | Sigma               | C00341  | CID 445995   | 0.7                                 | -2.79                              |

|                                                                                                                                                 |                  |                              |               |                     |        |             |                    |       |
|-------------------------------------------------------------------------------------------------------------------------------------------------|------------------|------------------------------|---------------|---------------------|--------|-------------|--------------------|-------|
| trans,trans-Farnesyl diphosphate;<br>Farnesyl diphosphate;<br>Farnesyl pyrophosphate;<br>2-trans,6-trans-Farnesyl diphosphate                   | FarnesylPP       | Sterol and prenol metabolism | Prenol Lipids | Sigma               | C00448 | CID 445713  | 2.6                | -2.79 |
| Geranylgeranyl diphosphate;<br>Geranylgeranyl pyrophosphate;<br>all-trans-Geranylgeranyl diphosphate;<br>all-trans-Geranylgeranyl pyrophosphate | GeranylgeranylPP | Sterol and prenol metabolism | Prenol Lipids | Sigma               | C00353 | CID 447277  | 4.4                | -2.79 |
| Squalene;<br>Spinacene;<br>Supraene                                                                                                             | Squalene         | Sterol and prenol metabolism | Prenol Lipids | Sigma               | C00751 | CID 5280370 | 11.6               | 0.00  |
| Ubiquinone;<br>Coenzyme Q;<br>CoQ;<br>Q                                                                                                         | CoenzymeQ        | Sterol and prenol metabolism | Prenol Lipids | Sigma               | C00399 | CID 5283544 | 12                 | 0.00  |
| Dolichol                                                                                                                                        | Dolichol         | Sterol and prenol metabolism | Prenol Lipids | Avanti Polar Lipids | C00381 | SID 3671    | (CID 24892719) 8.8 | 0.00  |
| Ergosterol;<br>Provitamin D2                                                                                                                    | Ergosterol       | Sterol and prenol metabolism | Sterol Lipids | Sigma               | C01694 | CID 444679  | 7.4                | 0.00  |
| Desmosterol;<br>24-Dehydrocholesterol;<br>Cholesta-5,24-dien-3beta-ol                                                                           | Desmosterol      | Sterol and prenol metabolism | Sterol Lipids | Sigma               | C01802 | CID 439577  | 8.3                | 0.00  |
| Ergocalciferol                                                                                                                                  | Ergocalciferol   | Sterol and prenol metabolism | Sterol Lipids | Sigma               | C05441 | CID 5280793 | 7.4                | 0.00  |

**Table S1B: List of all selected TAP-fusions.**

In total, 172 TAP-fusions were selected. The first and second columns give the systematic ORF and gene names, respectively. Third column gives the Uniprot (The UniProt Consortium, 2008) accession number for one of the predicted human orthologs. The presence of LBDs and protein classification are given in column four. When available, we also include information on affinity (Kd) for binding to a particular lipid binding in column five; the source PubMed reference is indicated in column six. The annotation "Domain" indicates experiments performed with truncated domains. An estimation of the level of TAP-fusion expression in yeast cells is represented in a scale from 1 (lowest) to 5 (highest) in column seven. Finally, TAP-tagged proteins expressed in *E. coli* are indicated with a "+" in column eight.

<sup>a</sup> Ecm25 has a cryptic CRAL/TRIO domain (present study)

<sup>b</sup> Ira2: prediction of a PH and CRAL/TRIO (Sec14) domain based on the structure of an homolog (D'Angelo, 2006)

| ORF     | Gene Name | Orthologs | LBD          | Affinities (Kd )                                                                    | PMID     | Expression levels<br>1 lowest, 5 highest | Recombinant<br>expression in <i>E. coli</i> |
|---------|-----------|-----------|--------------|-------------------------------------------------------------------------------------|----------|------------------------------------------|---------------------------------------------|
| YAL041W | Cdc24     | O43307    | PH           |                                                                                     |          | 4                                        |                                             |
| YAR042W | Swh1      | P22059    | PH/OBP       | PH Domain<br>PI4,5P 3microM<br>PI3,5P 3.5microM<br>PI3P 6.2microM<br>PI4P 2.8microM | 15023338 | 5                                        |                                             |
| YBL007C | Sla1      |           | Unclassified |                                                                                     |          | 4                                        |                                             |
| YBL060W | Yel1      |           | PH           |                                                                                     |          | 3                                        |                                             |
| YBL085W | Boi1      |           | PH           |                                                                                     |          | 1                                        | +                                           |
| YBL105C | Pkc1      | P17252    | C1/C2        |                                                                                     |          | 1                                        |                                             |
| YBR102C | Exo84     |           | PH           |                                                                                     |          | 1                                        |                                             |
| YBR115C | Lys2      |           | PP-binding   |                                                                                     |          | 5                                        |                                             |
| YBR129C | Opy1      |           | PH           |                                                                                     |          | 2                                        | +                                           |
| YBR158W | Amn1      |           | Unclassified |                                                                                     |          | 1                                        |                                             |
| YBR200W | Bem1      |           | PX           | PX Domain<br>PI3P >100microM                                                        | 11557775 | 5                                        |                                             |
| YBR213W | Met8      |           | Unclassified |                                                                                     |          | 3                                        |                                             |
| YBR265W | Tsc10     | Q06136    | Enzyme       |                                                                                     |          | 3                                        |                                             |
| YCL034W | Lsb5      |           | ANTH/ENTH    |                                                                                     |          | 1                                        |                                             |
| YCR009C | Rvs161    | Q9NQY0    | BAR          |                                                                                     |          | 5                                        |                                             |
| YCR093W | Cdc39     | A5YKK6    | Unclassified |                                                                                     |          | 3                                        |                                             |
| YDL052C | Slc1      | Q99943    | Enzyme       |                                                                                     |          | 5                                        |                                             |
| YDL113C | Atg20     |           | PX           | PX Domain<br>PI3P >100microM                                                        | 11557775 | 4                                        |                                             |
| YDL142C | Crd1      | Q9UJA2    | Enzyme       |                                                                                     |          | 3                                        |                                             |
| YDL161W | Ent1      | Q9Y6I3    | ANTH/ENTH    |                                                                                     |          | 1                                        |                                             |
| YDL205C | Hem3      | P08397    | Unclassified |                                                                                     |          | 2                                        |                                             |
| YDR103W | Ste5      |           | PH           |                                                                                     |          | 5                                        | +                                           |
| YDR105C | Tms1      | Q13530    | Serinc       |                                                                                     |          | 5                                        |                                             |
| YDR110W | Fob1      |           | Unclassified |                                                                                     |          | 4                                        |                                             |
| YDR121W | Dpb4      | Q9NRF9    | Unclassified |                                                                                     |          | 5                                        |                                             |
| YDR150W | Num1      |           | PH           | PH Domain<br>PI4,5P 1microM<br>PI3,5P no<br>PI3P no<br>PI4P no                      | 15023338 | 4                                        |                                             |
| YDR153C | Ent5      |           | ANTH/ENTH    |                                                                                     |          | 5                                        | +                                           |

|         |         |        |                 |                                                                                       |          |   |   |
|---------|---------|--------|-----------------|---------------------------------------------------------------------------------------|----------|---|---|
| YDR208W | Mss4    | Q99755 | Enzyme          |                                                                                       |          | 3 |   |
| YDR228C | Pcf11   | O94913 | ANTH/ENTH       |                                                                                       |          | 2 |   |
| YDR283C | Gcn2    | Q9P2K8 | lipid-regulated |                                                                                       |          | 5 | + |
| YDR289C | Rtt103  |        | ANTH/ENTH       |                                                                                       |          | 2 |   |
| YDR294C | Dpl1    | O95470 | Enzyme          |                                                                                       |          | 5 |   |
| YDR310C | Sum1    |        | Unclassified    |                                                                                       |          | 2 |   |
| YDR311W | Tfb1    | P32780 | PH              |                                                                                       |          | 3 |   |
| YDR313C | Pib1    |        | FYVE            |                                                                                       |          | 3 |   |
| YDR323C | Pep7    | Q9H1K0 | FYVE            |                                                                                       |          | 2 |   |
| YDR358W | Gga1    | Q9UJY5 | ANTH/ENTH       |                                                                                       |          | 5 |   |
| YDR388W | Rvs167  | P49418 | BAR             |                                                                                       |          | 5 |   |
| YDR425W | Snx41   |        | PX              |                                                                                       |          | 4 |   |
| YDR490C | Pkh1    | O15530 | lipid-regulated |                                                                                       |          | 3 | + |
| YDR505C | Psp1    |        | Unclassified    |                                                                                       |          | 2 |   |
| YDR517W | Grh1    |        | Unclassified    |                                                                                       |          | 2 |   |
| YDR524C | Age1    |        | Unclassified    |                                                                                       |          | 1 |   |
| YEL002C | Wbp1    | P39656 | Unclassified    |                                                                                       |          | 5 |   |
| YER091C | Met6    |        | Unclassified    |                                                                                       |          | 5 |   |
| YER114C | Boi2    |        | PH              | PH Domain<br>PI4,5P 9.7microM<br>PI3,5P 6.6microM<br>PI3P 19.5microM<br>PI4P 20microM | 15023338 | 3 |   |
| YER155C | Bem2    |        | PH              |                                                                                       |          | 4 | + |
| YFR002W | Nic96   |        | Unclassified    |                                                                                       |          | 3 |   |
| YFR006W | Yfr006w | P12955 | Unclassified    |                                                                                       |          | 5 | + |
| YFR021W | Atg18   | Q9Y484 | lipid-regulated | +Mg PI(3,5)P 180nM<br>-Mg PI(3,5)P 18nM<br>PI(3,4)P 190nM<br>PI(4,5)P 200nM           | 15103325 | 1 |   |
| YFR053C | Hxk1    | P35557 | lipid-regulated |                                                                                       |          | 3 |   |
| YGL001C | Erg26   | Q15738 | Enzyme          |                                                                                       |          | 5 |   |
| YGL055W | Ole1    | O00767 | Cyt-B5          |                                                                                       |          | 5 |   |
| YGL105W | Arc1    | Q12904 | lipid-regulated |                                                                                       |          | 4 |   |
| YGL131C | Snt2    |        | Unclassified    |                                                                                       |          | 1 | + |
| YGL173C | Kem1    | Q8IZH2 | Unclassified    |                                                                                       |          | 5 |   |
| YGL251C | Hfm1    |        | Unclassified    |                                                                                       |          | 1 |   |
| YGR080W | Twf1    |        | lipid-regulated |                                                                                       |          | 2 | + |
| YGR097W | Ask10   |        | PH              |                                                                                       |          | 4 |   |
| YGR100W | Mdr1    |        | PH              |                                                                                       |          | 5 |   |
| YGR170W | Psd2    |        | C2              |                                                                                       |          | 3 |   |
| YGR233C | Pho81   |        | Unclassified    |                                                                                       |          | 4 |   |
| YGR241C | Yap1802 | Q13492 | ANTH/ENTH       |                                                                                       |          | 5 | + |
| YHL002W | Hse1    | Q92783 | ANTH/ENTH       |                                                                                       |          | 4 |   |
| YHR001W | Osh7    | Q9H0X9 | OBP             |                                                                                       |          | 4 |   |
| YHR073W | Osh3    | Q9H4L5 | PH/OBP          |                                                                                       |          | 1 | + |
| YHR105W | Ypt35   |        | PX              | PX Domain<br>PI3P 0.15-0.5microM                                                      | 11557775 | 4 |   |

|         |         |        |                           |                              |          |   |   |
|---------|---------|--------|---------------------------|------------------------------|----------|---|---|
| YHR108W | Gga2    | Q9UJY5 | ANTH/ENTH                 |                              |          | 4 |   |
| YHR131C | Yhr131c |        | PH                        |                              |          | 1 |   |
| YHR155W | Ysp1    |        | PH                        |                              |          | 5 |   |
| YHR161C | Yap1801 | Q13492 | ANTH/ENTH                 |                              |          | 5 |   |
| YHR178W | Stb5    |        | Unclassified              |                              |          | 2 |   |
| YHR193C | Egd2    | Q13765 | lipid-regulated           |                              |          | 3 |   |
| YHR205W | Sch9    |        | C2                        |                              |          | 5 |   |
| YIL007C | Nas2    | O00233 | PDZ                       |                              |          | 1 |   |
| YIL043C | Cbr1    | Q6BCY4 | Unclassified              |                              |          | 2 |   |
| YIL063C | Yrb2    | Q9H6Z4 | PH                        |                              |          | 4 |   |
| YIL105C | Slm1    |        | PH                        |                              |          | 5 | + |
| YIL128W | Met18   |        | Unclassified              |                              |          | 2 |   |
| YIL151C | Yil151c |        | Unclassified              |                              |          | 1 |   |
| YJL036W | Snx4    |        | PX                        | PX Domain<br>PI3P >100microM | 11557775 | 2 |   |
| YJL097W | Phs1    |        | Enzyme                    |                              |          | 1 |   |
| YJL145W | Yjl145w |        | CRAL/TRIO                 |                              |          | 3 | + |
| YJL157C | Far1    |        | Unclassified              |                              |          | 1 |   |
| YJL201W | Ecm25   |        | Unclassified <sup>a</sup> |                              |          | 2 |   |
| YJR092W | Bud4    |        | PH                        |                              |          | 3 |   |
| YJR130C | Str2    |        | Unclassified              |                              |          | 1 |   |
| YKL088W | Ykl088w |        | Enzyme                    |                              |          | 4 |   |
| YKL091C | Ykl091c | Q92503 | CRAL/TRIO                 |                              |          | 5 |   |
| YKL092C | Bud2    | Q15283 | C2                        |                              |          | 2 |   |
| YKL114C | Apn1    |        | Unclassified              |                              |          | 1 |   |
| YKL126W | Ypk1    | O00141 | lipid-regulated           |                              |          | 5 |   |
| YKL192C | Acp1    | O14561 | PP-binding                |                              |          | 1 |   |
| YKL194C | Mst1    |        | Unclassified              |                              |          | 1 |   |
| YKR003W | Osh6    | Q9H0X9 | OBP                       |                              |          | 4 |   |
| YKR031C | Spo14   | Q13393 | PH/PX                     |                              |          | 1 |   |
| YKR054C | Dyn1    | Q14204 | Unclassified              |                              |          | 1 |   |
| YKR078W | Ykr078w |        | PX                        |                              |          | 1 |   |
| YKR081C | Rpf2    |        | Unclassified              |                              |          | 3 | + |
| YLL001W | Dnm1    | O00429 | Unclassified              |                              |          | 4 |   |
| YLL038C | Ent4    |        | ANTH/ENTH                 |                              |          | 1 |   |
| YLR100W | Erg27   | P56937 | Enzyme                    |                              |          | 5 |   |
| YLR178C | Tfs1    | P30086 | PBP                       |                              |          | 3 |   |
| YLR179C | Ylr179c | P30086 | PBP                       |                              |          | 1 |   |
| YLR187W | Skg3    |        | PH                        |                              |          | 3 |   |
| YLR189C | Atg26   |        | PH                        |                              |          | 4 |   |
| YLR206W | Ent2    | Q9Y6I3 | ANTH/ENTH                 |                              |          | 3 |   |
| YLR260W | Lcb5    | Q9NYA1 | Enzyme                    |                              |          | 3 |   |
| YLR298C | Yhc1    |        | Unclassified              |                              |          | 4 |   |
| YLR335W | Nup2    |        | PH                        |                              |          | 4 |   |
| YLR336C | Sgd1    |        | Unclassified              |                              |          | 2 |   |
| YLR371W | Rom2    | Q9NR81 | PH                        |                              |          | 3 | + |
| YLR380W | Csr1    |        | CRAL/TRIO                 |                              |          | 5 | + |
| YLR425W | Tus1    |        | PH                        |                              |          | 3 | + |
| YML052W | Sur7    |        | lipid-regulated           |                              |          | 5 | + |

|         |         |        |                           |                                                                                           |          |   |   |
|---------|---------|--------|---------------------------|-------------------------------------------------------------------------------------------|----------|---|---|
| YML054C | Cyb2    | Q9UJM8 | Cyt-B5                    |                                                                                           |          | 5 |   |
| YML072C | Tcb3    | Q14183 | C2                        |                                                                                           |          | 5 |   |
| YML112W | Ctk3    |        | Unclassified              |                                                                                           |          | 2 |   |
| YML126C | Erg13   | Q01581 | Enzyme                    |                                                                                           |          | 4 |   |
| YMR004W | Mvp1    |        | PX                        |                                                                                           |          | 4 |   |
| YMR015C | Erg5    |        | Enzyme                    |                                                                                           |          | 4 |   |
| YMR073C | Ymr073c |        | Cyt-B5                    |                                                                                           |          | 2 |   |
| YMR079W | Sec14   | Q92503 | CRAL/TRIO                 | PI 381 nM                                                                                 | 12767229 | 5 | + |
| YMR083W | Adh3    |        | Unclassified              |                                                                                           |          | 4 |   |
| YMR104C | Ypk2    | O00141 | lipid-regulated           |                                                                                           |          | 4 |   |
| YMR108W | Ilv2    |        | lipid-regulated           |                                                                                           |          | 4 |   |
| YMR113W | Fol3    |        | Unclassified              |                                                                                           |          | 4 |   |
| YMR127C | Sas2    |        | Unclassified              |                                                                                           |          | 1 |   |
| YMR170C | Ald2    |        | Unclassified              |                                                                                           |          | 5 |   |
| YMR208W | Erg12   | Q03426 | Enzyme                    |                                                                                           |          | 5 |   |
| YMR272C | Scs7    |        | Cyt-B5                    |                                                                                           |          | 5 |   |
| YMR308C | Pse1    | O00410 | Unclassified              |                                                                                           |          | 5 |   |
| YNL047C | Slm2    |        | PH                        |                                                                                           |          | 3 |   |
| YNL087W | Tcb2    | Q14183 | C2                        |                                                                                           |          | 3 |   |
| YNL111C | Cyb5    | P00167 | Cyt-B5                    |                                                                                           |          | 5 |   |
| YNL127W | Far11   |        | Unclassified              |                                                                                           |          | 3 |   |
| YNL135C | Fpr1    | P62942 | Unclassified              |                                                                                           |          | 4 |   |
| YNL144C | Ynl144c |        | PH                        |                                                                                           |          | 1 |   |
| YNL201C | Psy2    |        | PH                        |                                                                                           |          | 2 |   |
| YNL231C | Pdr16   |        | CRAL/TRIO                 |                                                                                           |          | 1 |   |
| YNL243W | Sla2    | O00291 | ANTH/ENTH                 |                                                                                           |          | 4 | + |
| YNL251C | Nrd1    |        | ANTH/ENTH                 |                                                                                           |          | 4 |   |
| YNL264C | Pdr17   |        | CRAL/TRIO                 |                                                                                           |          | 2 |   |
| YNL278W | Caf120  |        | PH                        |                                                                                           |          | 3 |   |
| YNL298W | Cla4    |        | PH                        | PH Domain<br>PI4,5P 20.4microM<br>PI3,5P 20.2microM<br>PI3P >100microM<br>PI4P >100microM | 15023338 | 1 |   |
| YNR006W | Vps27   | O14964 | FYVE/ANTH/ENTH            |                                                                                           |          | 4 | + |
| YNR043W | Mvd1    | P53602 | Enzyme                    |                                                                                           |          | 4 |   |
| YOL081W | Ira2    |        | Unclassified <sup>b</sup> |                                                                                           |          | 1 |   |
| YOL100W | Pkh2    | O15530 | lipid-regulated           |                                                                                           |          | 4 |   |
| YOL113W | Skm1    |        | PH                        | PH Domain<br>PI4,5P 3.9microM<br>PI3,5P 6.4microM<br>PI3P 8microM<br>PI4P 8.2microM       | 15023338 | 3 |   |
| YOL139C | Cdc33   | P06730 | lipid-regulated           |                                                                                           |          | 4 |   |
| YOL149W | Dcp1    | Q9NPI6 | PH                        |                                                                                           |          | 4 |   |
| YOR132W | Vps17   |        | PX                        | PX Domain<br>PI3P >100microM                                                              | 11557775 | 4 |   |
| YOR171C | Lcb4    | Q9NRA0 | Enzyme                    |                                                                                           |          | 3 |   |
| YOR181W | Las17   | P42768 | PH                        |                                                                                           |          | 1 |   |

|         |         |        |                 |                              |          |   |   |
|---------|---------|--------|-----------------|------------------------------|----------|---|---|
| YOR227W | Her1    |        | Unclassified    |                              |          | 4 | + |
| YOR254C | Sec63   | Q9UGP8 | Unclassified    |                              |          | 5 | + |
| YPL004C | Lsp1    |        | lipid-regulated |                              |          | 4 | + |
| YPL028W | Erg10   | P24752 | Enzyme          |                              |          | 1 |   |
| YPL069C | Bts1    | O95749 | Enzyme          |                              |          | 5 |   |
| YPL115C | Bem3    |        | PH/PX           | PX Domain<br>PI3P >100microM | 11557775 | 4 |   |
| YPL117C | Idi1    | Q13907 | Enzyme          |                              |          | 4 |   |
| YPL145C | Kes1    |        | OBP             |                              |          | 4 | + |
| YPL150W | Ypl150w |        | Unclassified    |                              |          | 2 |   |
| YPL170W | Dap1    | O00264 | Cyt-B5          |                              |          | 1 |   |
| YPL243W | Srp68   | Q9UHB9 | Unclassified    |                              |          | 5 |   |
| YPR019W | Mcm4    | P33991 | Unclassified    |                              |          | 3 |   |
| YPR091C | Ypr091c |        | PH              |                              |          | 3 | + |
| YPR095C | Syt1    |        | PH              |                              |          | 4 |   |
| YPR097W | Ypr097w |        | PX              |                              |          | 5 |   |
| YPR174C | Ypr174c |        | Unclassified    |                              |          | 1 |   |
| YPR181C | Sec23   |        | Unclassified    |                              |          | 1 |   |

This table summarizes protein-lipid interactions detected with lipid-arrays. It includes both the 26 replicates performed and the interactions confirmed with recombinant proteins. The first and second columns give the systematic ORF and gene names, respectively. The first row lists the 56 lipids analyzed. Replicates are shown consecutively in the table and TAP-fusions expressed in *E. coli* are indicated with an \*. Non-physiological lipids are labeled with an #.

[illegible]

[illegible]

[illegible]

[illegible]

[illegible]

The matrix consists of 530 protein-lipid interactions. First and second columns give the systematic ORF and gene names. The third column indicates LBDs and protein classification. The first row lists the 56 lipids analyzed. Those interactions that did not appear in two duplicates were discarded from the consolidated dataset. The interactions for those lipids that were excluded for further analysis are shown separately. Interactions reported for Slm1-PH expressed in *E. coli* are also shown. Non-physiological lipids are labeled with an #.

[illegible]



|         |         |                 |
|---------|---------|-----------------|
| YLR371W | Rom2    | PH              |
| YLR380W | Csr1    | CRAL/TRIO       |
| YLR425W | Tus1    | PH              |
| YML052W | Sur7    | Lipid-regulated |
| YML054C | Cyb2    | Cyt-b5          |
| YML072C | Tcb3    | C2              |
| YML112W | Ctk3    | Unclassified    |
| YML126C | Erg13   | Enzyme          |
| YMR004W | Mvp1    | PX              |
| YMR015C | Erg5    | Enzyme          |
| YMR073C | Ymr073c | Cyt-b5          |
| YMR079W | Sec14   | CRAL/TRIO       |
| YMR083W | Adh3    | Unclassified    |
| YMR104C | Ypk2    | Lipid-regulated |
| YMR108W | Iiv2    | Lipid-regulated |
| YMR113W | Fol3    | Unclassified    |
| YMR127C | Sas2    | Unclassified    |
| YMR170C | Ald2    | Unclassified    |
| YMR208W | Erg12   | Enzyme          |
| YMR272C | Scs7    | Cyt-b5          |
| YMR308C | Pse1    | Unclassified    |
| YNL047C | Sim2    | PH              |
| YNL087W | Tcb2    | C2              |
| YNL111C | Cyb5    | Cyt-b5          |
| YNL127W | Far11   | Unclassified    |
| YNL135C | Fpr1    | Unclassified    |
| YNL144C | Ynl144c | PH              |
| YNL201C | Psy2    | PH              |
| YNL231C | Pdr16   | CRAL/TRIO       |
| YNL243W | Sla2    | ANTH/ENTH       |
| YNL251C | Nrd1    | ANTH/ENTH       |
| YNL264C | Pdr17   | CRAL/TRIO       |
| YNL278W | Caf120  | PH              |
| YNL298W | Cia4    | PH              |
| YNR006W | Vps27   | FYVE; ANTH/ENTH |
| YNR043W | Mvd1    | Enzyme          |
| YOL081W | Ira2    | Unclassified    |
| YOL100W | Pkh2    | Lipid-regulated |
| YOL113W | Skm1    | PH              |
| YOL139C | Cdc33   | Lipid-regulated |
| YOL149W | Dcp1    | PH              |
| YOR132W | Vps17   | PX              |
| YOR171C | Lcb4    | Enzyme          |
| YOR181W | Las17   | PH              |
| YOR227W | Her1    | Unclassified    |
| YOR254C | Sec63   | Unclassified    |
| YPL004C | Lsp1    | Lipid-regulated |
| YPL028W | Erg10   | Enzyme          |
| YPL069C | Bts1    | Enzyme          |
| YPL115C | Bem3    | PH; PX          |
| YPL117C | Idi1    | Enzyme          |
| YPL145C | Kes1    | OBP             |
| YPL150W | Ypl150w | Unclassified    |
| YPL170W | Dap1    | Cyt-b5          |
| YPL243W | Srp68   | Unclassified    |
| YPR019W | Mcm4    | Unclassified    |
| YPR091C | Ypr091c | PH              |
| YPR095C | Syt1    | PH              |
| YPR097W | Ypr097w | PX              |
| YPR174C | Ypr174c | Unclassified    |
| YPR181C | Sec23   | Unclassified    |

The matrix consists of 530 protein-lipid interactions and their supporting evidence. First and second columns give the systematic ORF and gene names. The third column indicates LBDs and protein classification. The first row lists the 44 lipids remaining after removing those lipids excluded for further analysis. Those interactions that did not appear in two duplicates were discarded from the consolidated dataset. Non-physiological lipids are labeled with an #. Supporting evidence are letter coded according to the protein-lipid interaction is supported by: R, Replicates with the lipid-array; E, recombinant protein expressed in *E. coli*; G, Genetic interactions; S, sphingolipid depletion with Myriocin; P, PtdInsPs depletion with *Mss4*<sup>Δ</sup>; L, Liposome based assays.

[illegible]



The matrix consists of 71 biochemically characterized protein-lipid interactions. Among them 40 are regulatory, the other 31 take place between lipid-enzymes or transporters and their substrates or products. The first and second columns give the systematic ORF and gene names. The first row lists the 44 lipids analyzed. Non-physiological lipids are labeled with an #.

|  |                                    |
|--|------------------------------------|
|  | Regulatory interactions            |
|  | Transporter-substrate interactions |
|  | Enzyme-substrate interactions      |
|  | Enzyme-product interactions        |

[illegible]

|         |         |
|---------|---------|
| YLR371W | Rom2    |
| YLR380W | Csr1    |
| YMR079W | Sec14   |
| YMR108W | Ilv2    |
| YMR272C | Scs7    |
| YNL047C | Slm2    |
| YNL231C | Pdr16   |
| YNL243W | Sla2    |
| YNL264C | Pdr17   |
| YOR171C | Lcb4    |
| YPL069C | Bts1    |
| YPL145C | Kes1    |
| YPL150W | Ypl150w |

**Table S3B: The literature-derived reference set: literature curated list of interactions biochemically characterized.**

The first and second columns give the systematic ORF and gene names. The third column lists the reported interactions and the name of the interacting lipids, with the estimated Kd when available. For enzymes, a simple representation of the reaction is shown. Finally, the fourth column collects the publication (PubMed ID) where the respective interaction (or enzymatic reaction) was reported.

| ORF     | Gene Name | List of interactions                                                                                            | Reference (PubMed ID) |
|---------|-----------|-----------------------------------------------------------------------------------------------------------------|-----------------------|
| YBL105C | Pkc1      | Binds DAG                                                                                                       | 9395299               |
| YBR129C | Opy1      | Binds PtdIns(4)P, PtdIns(4,5)P2 and PtdIns(3,4,5)P3                                                             | 11474067              |
| YBR213W | Met8      | Binds PtdIns(3)P, PtdIns(4)P, and PtdIns(4,5)P2                                                                 | 11474067              |
| YBR265W | Tsc10     | Enzyme: 3-ketodihydrosphingosine-> DHS                                                                          | 16730802              |
| YDL052C | Slc1      | Enzyme: acyl-CoA + 1acyl-glycerol 3P -> CoA + PA                                                                | 9212466 and 8408076   |
| YDL142C | Crd1      | Enzyme: PG+CDP-DAG -> Cardiolipin                                                                               | 9614098               |
| YDL161W | Ent1      | Binds PtdIns(3)P, PtdIns(4)P, PtdIns(4,5)P2 and PtdIns(3,4,5)P3                                                 | 12529323              |
| YDR208W | Mss4      | Enzyme: PtdIns(4)P->PtdIns(4,5)P2                                                                               | 9624177 and 15741172  |
| YDR283C | Gcn2      | Binds PtdIns(3)P, PtdIns(4)P, PtdIns(4,5)P2 and PtdIns(3,4,5)P3                                                 | 11474067              |
| YDR294C | Dpl1      | Enzyme: Phytosphingosine-P or DHS-1P -> Ethanolamine-P and C16-aldehydes                                        | 16730802              |
| YDR313C | Pib1      | Binds PtdIns(3)P                                                                                                | 11526110              |
| YFR021W | Atg18     | Binds PtdIns(3)P<br>+Mg PI(3,5)P2 Kd=180nM<br>-Mg PI(3,5)P2 Kd=18nM<br>PI(3,4)P2 Kd=190nM<br>PI(4,5)P2 Kd=200nM | 15103325              |
| YFR053C | Hxk1      | Binds PtdIns(3)P, PtdIns(4)P, PtdIns(4,5)P2 and PtdIns(3,4,5)P3                                                 | 11474067 and 10888410 |
| YGL105W | Arc1      | Binds PtdIns(3)P                                                                                                | 16343487              |
| YGR080W | Twf1      | Binds PtdIns(4,5)P2                                                                                             | 11604420              |
| YHR193C | Egd2      | Binds PtdIns(3)P and PtdIns(4)P                                                                                 | 16343487              |
| YIL105C | Slm1      | Binds PtdIns(3)P, PtdIns(4)P and PtdIns(4,5)P2                                                                  | 15372071 and          |
| YJL145W | Yjl145w   | Transfers PtdIns                                                                                                | 10848624              |
| YKR031C | Spo14     | Enzyme: PC->PA + Choline                                                                                        | 11514437              |
| YLR260W | Lcb5      | Enzyme: DHS and Phytosphingosine->DHS-1P and Phytosphingosine-P                                                 | 16730802              |
| YLR371W | Rom2      | Binds PtdIns(4,5)P2                                                                                             | 12015967              |
| YLR380W | csr1      | Transfers PtdIns                                                                                                | 10848624              |
| YMR079W | Sec14     | Transfers PtdIns and PC                                                                                         | 2215682               |
| YMR108W | Ilv2      | Binds Cardiolipin                                                                                               | 16343487              |
| YMR272C | Scs7      | Enzyme: Phytoceramide->Hydroxy-Phytoceramide                                                                    | 9368039               |
| YNL047C | Slm2      | Binds PtdIns(4,5)P2                                                                                             | 17101780              |
| YNL231C | Pdr16     | Transfers PtdIns                                                                                                | 10848624              |
| YNL243W | Sla2      | Binds PtdIns(4,5)P2                                                                                             | 15574875              |
| YNL264C | Pdr17     | Transfers PtdIns                                                                                                | 10848624              |
| YOR171C | Lcb4      | Enzyme: DHS and Phytosphingosine->DHS-1P and Phytosphingosine-P                                                 | 16730802              |
| YPL069C | Bts1      | Enzyme: geranyl-PP -> Farnesyl-PP -> Geranylgeranyl-PP                                                          | 7665600               |
| YPL145C | Kes1      | Transfers ergosterol.                                                                                           | 16585271 and          |
| YPL150W | Ypl150w   | Binds PtdIns, PtdIns(4)P, PtdIns(4,5)P2 and Cardiolipin<br>PtdIns(4)P, PtdIns(4,5)P2 and PtdIns(3,4,5)P3        | 11916983<br>11474067  |

The matrix consists of 328 described genetic interactions between 172 analyzed proteins (rows) and 96 enzymes involved in lipid metabolism (columns). The first and second columns give the systematic ORF and gene names, respectively. Enzymes are grouped by metabolic pathways. The gene names for lipid metabolic enzymes are described in brackets. Genetic interactions were collected from literature and SGD database. SGD annotation was employed to classify the different genetic interactions types. Note that for simplicity the following groups were defined and represented with a letter code: C, Chemical Genetics; D, Dosage Dependent Interaction (Dosage rescue + Dosage growth defect + Dosage lethality); P, Positive Suppressing Genetics (Positive genetics + Synthetic rescue + Phenotypic suppression); N, Negative Synthetic Genetics (Negative genetics + Synthetic lethality + Synthetic growth defect). Numbers refer to the literature source of the published interactions (see legend on top left corner of the matrix). Note that for reference PMID:2093466 the stringent threshold was used.



[illegible]

[illegible]

[illegible]

[illegible]

[illegible]

[illegible]



[illegible]

[illegible]

[illegible]

**Table S4. Detected interactions, and whether or not they were supported by yeast replicates, *E.coli* replicates, genetic interactions, the myriocin assay, the *mss4<sup>ts</sup>* assay, or a liposome based assay.**

| Protein | Lipid                                | Yeast | Ecoli | Genetic | Myriocin | <i>mss4<sup>ts</sup></i> | Liposome |
|---------|--------------------------------------|-------|-------|---------|----------|--------------------------|----------|
| Swh1    | PtdIns(4)P                           | 0     | 0     | 1       | 0        | 0                        | 0        |
| Sla1    | PtdIns(3)P                           | 0     | 0     | 1       | 0        | 0                        | 0        |
| Sla1    | PtdIns(3,4,5)P3                      | 0     | 0     | 1       | 0        | 0                        | 0        |
| Sla1    | DHS-1P                               | 0     | 0     | 1       | 0        | 0                        | 0        |
| Sla1    | Phytosphingosine-1P                  | 0     | 0     | 1       | 0        | 0                        | 0        |
| Sla1    | Phytoceramide C18                    | 0     | 0     | 1       | 0        | 0                        | 0        |
| Boi1    | DHS-1P                               | 0     | 1     | 0       | 0        | 0                        | 0        |
| Boi1    | Digalactosyl-DAG                     | 0     | 0     | 0       | 0        | 0                        | 0        |
| Opy1    | PtdIns(4)P                           | 1     | 1     | 0       | 0        | 0                        | 0        |
| Opy1    | PtdIns(4,5)P2                        | 1     | 1     | 0       | 0        | 0                        | 0        |
| Opy1    | Cardiolipin                          | 1     | 1     | 0       | 0        | 0                        | 0        |
| Opy1    | DHS-1P                               | 1     | 1     | 0       | 1        | 0                        | 0        |
| Bem1    | Phytoceramide C18                    | 1     | 0     | 0       | 0        | 0                        | 0        |
| Tsc10   | Phytoceramide C18                    | 0     | 0     | 1       | 1        | 0                        | 0        |
| Rvs161  | PtdIns(3)P                           | 0     | 0     | 0       | 0        | 1                        | 0        |
| Rvs161  | PtdIns(3,4,5)P3                      | 0     | 0     | 0       | 0        | 1                        | 0        |
| Slc1    | Phytoceramide C18                    | 0     | 0     | 1       | 0        | 0                        | 0        |
| Atg20   | PtdIns(4)P                           | 1     | 0     | 1       | 0        | 0                        | 0        |
| Atg20   | PtdIns(4,5)P2                        | 1     | 0     | 1       | 0        | 0                        | 0        |
| Atg20   | PtdIns(3,4,5)P3                      | 1     | 0     | 1       | 0        | 0                        | 0        |
| Atg20   | PtdIns                               | 1     | 0     | 0       | 0        | 0                        | 0        |
| Atg20   | Dolichol                             | 1     | 0     | 0       | 0        | 0                        | 0        |
| Crd1    | PC                                   | 0     | 0     | 1       | 0        | 0                        | 0        |
| Crd1    | P-methylethanolamine                 | 0     | 0     | 1       | 0        | 0                        | 0        |
| Crd1    | P-dimethylethanolamine               | 0     | 0     | 1       | 0        | 0                        | 0        |
| Crd1    | Ceramide                             | 0     | 0     | 0       | 0        | 0                        | 0        |
| Crd1    | Phytoceramide C18                    | 0     | 0     | 0       | 0        | 0                        | 0        |
| Crd1    | Hexadecanoic                         | 0     | 0     | 0       | 0        | 0                        | 0        |
| Crd1    | TAG                                  | 0     | 0     | 0       | 0        | 0                        | 0        |
| Crd1    | 1,2-DA-3 $\beta$ -galactosylglycerol | 0     | 0     | 0       | 0        | 0                        | 0        |
| Crd1    | 1acyl-glycerol-3P                    | 0     | 0     | 0       | 0        | 0                        | 0        |
| Crd1    | Dolichol                             | 0     | 0     | 0       | 0        | 0                        | 0        |
| Crd1    | Ergosterol                           | 0     | 0     | 0       | 0        | 0                        | 0        |
| Ent1    | PtdIns(4,5)P2                        | 0     | 0     | 0       | 0        | 0                        | 0        |
| Ent1    | PtdIns(3,4,5)P3                      | 0     | 0     | 0       | 0        | 0                        | 0        |
| Ste5    | PtdIns(4)P                           | 0     | 1     | 0       | 0        | 0                        | 0        |
| Ste5    | PtdIns(4,5)P2                        | 0     | 1     | 0       | 0        | 0                        | 0        |
| Ste5    | PtdIns(3,4,5)P3                      | 0     | 1     | 0       | 0        | 0                        | 0        |
| Ste5    | Cardiolipin                          | 0     | 1     | 0       | 0        | 0                        | 0        |
| Tms1    | Hexadecanoic                         | 0     | 0     | 0       | 0        | 0                        | 0        |
| Tms1    | TAG                                  | 0     | 0     | 0       | 0        | 0                        | 0        |
| Fob1    | PtdIns(3)P                           | 1     | 0     | 0       | 0        | 0                        | 0        |
| Fob1    | PtdIns(3,4,5)P3                      | 1     | 0     | 0       | 0        | 0                        | 0        |
| Dpb4    | PtdIns(3)P                           | 1     | 0     | 0       | 0        | 0                        | 0        |
| Dpb4    | PtdIns(4)P                           | 1     | 0     | 0       | 0        | 0                        | 0        |

|        |                   |   |   |   |   |   |   |
|--------|-------------------|---|---|---|---|---|---|
| Dpb4   | PtdIns(4,5)P2     | 1 | 0 | 0 | 0 | 0 | 0 |
| Dpb4   | PtdIns            | 1 | 0 | 0 | 0 | 0 | 0 |
| Dpb4   | Cardiolipin       | 1 | 0 | 0 | 0 | 0 | 0 |
| Dpb4   | Dolichol          | 1 | 0 | 0 | 0 | 0 | 0 |
| Dpb4   | Ergosterol        | 1 | 0 | 0 | 0 | 0 | 0 |
| Dpb4   | Ergocalciferol    | 1 | 0 | 0 | 0 | 0 | 0 |
| Num1   | PtdIns(4)P        | 0 | 0 | 1 | 0 | 0 | 0 |
| Num1   | PtdIns(4,5)P2     | 0 | 0 | 1 | 0 | 0 | 0 |
| Num1   | PtdIns(3,4,5)P3   | 0 | 0 | 1 | 0 | 0 | 0 |
| Num1   | DHS-1P            | 0 | 0 | 0 | 0 | 0 | 0 |
| Ent5   | PtdIns(3)P        | 1 | 1 | 1 | 0 | 0 | 0 |
| Ent5   | PtdIns(4)P        | 1 | 1 | 1 | 0 | 0 | 0 |
| Ent5   | PtdIns(4,5)P2     | 1 | 1 | 1 | 0 | 0 | 0 |
| Ent5   | PtdIns(3,4,5)P3   | 1 | 1 | 1 | 0 | 0 | 0 |
| Ent5   | PtdIns            | 1 | 0 | 0 | 0 | 0 | 0 |
| Ent5   | Cardiolipin       | 1 | 1 | 0 | 0 | 0 | 0 |
| Ent5   | DHS-1P            | 1 | 1 | 0 | 1 | 0 | 0 |
| Mss4   | PtdIns(4)P        | 0 | 0 | 1 | 0 | 0 | 0 |
| Mss4   | PtdIns(4,5)P2     | 0 | 0 | 1 | 0 | 0 | 0 |
| Mss4   | PtdIns(3,4,5)P3   | 0 | 0 | 1 | 0 | 0 | 0 |
| Mss4   | PtdIns            | 0 | 0 | 0 | 0 | 0 | 0 |
| Mss4   | DHS-1P            | 0 | 0 | 1 | 1 | 0 | 0 |
| Mss4   | 1acyl-glycerol-3P | 0 | 0 | 0 | 0 | 0 | 0 |
| Pcf11  | PtdIns(3)P        | 0 | 0 | 0 | 0 | 0 | 0 |
| Pcf11  | PtdIns            | 0 | 0 | 1 | 0 | 0 | 0 |
| Pcf11  | TAG               | 0 | 0 | 0 | 0 | 0 | 0 |
| Gcn2   | PtdIns(3)P        | 1 | 0 | 1 | 0 | 0 | 0 |
| Gcn2   | PtdIns(4,5)P2     | 1 | 1 | 1 | 0 | 0 | 0 |
| Gcn2   | PtdIns(3,4,5)P3   | 1 | 0 | 1 | 0 | 0 | 0 |
| Gcn2   | PE                | 1 | 0 | 0 | 0 | 0 | 0 |
| Gcn2   | Phytoceramide C18 | 1 | 0 | 0 | 0 | 0 | 0 |
| Gcn2   | Dolichol          | 1 | 0 | 0 | 0 | 0 | 0 |
| Rtt103 | PtdIns(3)P        | 0 | 0 | 1 | 0 | 0 | 0 |
| Rtt103 | PtdIns(4,5)P2     | 0 | 0 | 1 | 0 | 0 | 0 |
| Rtt103 | PtdIns            | 0 | 0 | 1 | 0 | 0 | 0 |
| Rtt103 | Cardiolipin       | 0 | 0 | 1 | 0 | 0 | 0 |
| Rtt103 | PE                | 0 | 0 | 1 | 0 | 0 | 0 |
| Rtt103 | TAG               | 0 | 0 | 0 | 0 | 0 | 0 |
| Dpl1   | DHS-1P            | 0 | 0 | 1 | 0 | 0 | 0 |
| Dpl1   | Phytoceramide C18 | 0 | 0 | 1 | 0 | 0 | 0 |
| Sum1   | PtdIns(3,4,5)P3   | 0 | 0 | 0 | 0 | 0 | 0 |
| Sum1   | PE                | 0 | 0 | 1 | 0 | 0 | 0 |
| Tfb1   | TAG               | 0 | 0 | 0 | 0 | 0 | 0 |
| Tfb1   | Dolichol          | 0 | 0 | 1 | 0 | 0 | 0 |
| Pib1   | PtdIns(3)P        | 0 | 0 | 0 | 0 | 0 | 0 |
| Pep7   | Cardiolipin       | 0 | 0 | 0 | 0 | 0 | 0 |
| Pep7   | TAG               | 0 | 0 | 0 | 0 | 0 | 0 |
| Pep7   | Dolichol          | 0 | 0 | 0 | 0 | 0 | 0 |
| Gga1   | PtdIns(3)P        | 0 | 0 | 1 | 0 | 0 | 0 |
| Gga1   | PtdIns(4)P        | 0 | 0 | 1 | 0 | 0 | 0 |
| Gga1   | PtdIns(4,5)P2     | 0 | 0 | 1 | 0 | 0 | 0 |

|         |                     |   |   |   |   |   |   |
|---------|---------------------|---|---|---|---|---|---|
| Gga1    | PtdIns              | 0 | 0 | 0 | 0 | 0 | 0 |
| Gga1    | PE                  | 0 | 0 | 0 | 0 | 0 | 0 |
| Gga1    | Phytoceramide C18   | 0 | 0 | 1 | 0 | 0 | 0 |
| Gga1    | TAG                 | 0 | 0 | 0 | 0 | 0 | 0 |
| Gga1    | Dolichol            | 0 | 0 | 0 | 0 | 0 | 0 |
| Rvs167  | PtdIns(4)P          | 0 | 0 | 0 | 0 | 1 | 0 |
| Rvs167  | PtdIns(4,5)P2       | 0 | 0 | 0 | 0 | 1 | 1 |
| Rvs167  | PtdIns(3,4,5)P3     | 0 | 0 | 0 | 0 | 1 | 0 |
| Rvs167  | PtdIns              | 0 | 0 | 1 | 0 | 0 | 0 |
| Rvs167  | DHS-1P              | 0 | 0 | 1 | 1 | 0 | 1 |
| Rvs167  | Phytosphingosine-1P | 0 | 0 | 1 | 1 | 0 | 0 |
| Rvs167  | TAG                 | 0 | 0 | 1 | 0 | 0 | 0 |
| Rvs167  | Dolichol            | 0 | 0 | 1 | 0 | 0 | 0 |
| Snx41   | PtdIns(3)P          | 1 | 0 | 0 | 0 | 0 | 0 |
| Snx41   | PtdIns(4)P          | 1 | 0 | 0 | 0 | 0 | 0 |
| Snx41   | PtdIns(4,5)P2       | 1 | 0 | 0 | 0 | 0 | 0 |
| Snx41   | PtdIns(3,4,5)P3     | 1 | 0 | 0 | 0 | 0 | 0 |
| Snx41   | Cardiolipin         | 1 | 0 | 1 | 0 | 0 | 0 |
| Snx41   | PE                  | 1 | 0 | 1 | 0 | 0 | 0 |
| Snx41   | Phytoceramide C18   | 1 | 0 | 0 | 0 | 0 | 0 |
| Pkh1    | PtdIns(4)P          | 1 | 1 | 0 | 0 | 0 | 0 |
| Pkh1    | PtdIns(4,5)P2       | 1 | 1 | 0 | 0 | 0 | 0 |
| Pkh1    | PtdIns              | 1 | 0 | 0 | 0 | 0 | 0 |
| Pkh1    | Cardiolipin         | 1 | 1 | 0 | 0 | 0 | 0 |
| Pkh1    | PE                  | 1 | 1 | 0 | 0 | 0 | 0 |
| Pkh1    | DHS-1P              | 1 | 1 | 1 | 0 | 0 | 0 |
| Age1    | PtdIns(3,4,5)P3     | 0 | 0 | 0 | 0 | 0 | 0 |
| Age1    | PE                  | 0 | 0 | 0 | 0 | 0 | 0 |
| Met6    | PtdIns(4)P          | 0 | 0 | 1 | 0 | 0 | 0 |
| Met6    | PtdIns(4,5)P2       | 0 | 0 | 1 | 0 | 0 | 0 |
| Met6    | Phytoceramide C18   | 0 | 0 | 0 | 1 | 0 | 0 |
| Met6    | Digalactosyl-DAG    | 0 | 0 | 0 | 0 | 0 | 0 |
| Met6    | Dolichol            | 0 | 0 | 0 | 0 | 0 | 0 |
| Boi2    | PtdIns(3)P          | 1 | 0 | 1 | 0 | 0 | 0 |
| Boi2    | PtdIns(4)P          | 1 | 0 | 1 | 0 | 0 | 0 |
| Boi2    | PtdIns(4,5)P2       | 1 | 0 | 1 | 0 | 0 | 0 |
| Boi2    | PtdIns(3,4,5)P3     | 1 | 0 | 1 | 0 | 0 | 0 |
| Boi2    | DHS-1P              | 1 | 0 | 0 | 0 | 0 | 0 |
| Boi2    | Phytosphingosine-1P | 1 | 0 | 0 | 0 | 0 | 0 |
| Bem2    | PtdIns(3,4,5)P3     | 0 | 1 | 1 | 0 | 0 | 0 |
| Bem2    | PE                  | 0 | 1 | 1 | 0 | 0 | 0 |
| Bem2    | DHS-1P              | 0 | 1 | 0 | 0 | 0 | 0 |
| Yfr006w | PtdIns(3,4,5)P3     | 1 | 0 | 0 | 0 | 0 | 0 |
| Atg18   | PtdIns(3)P          | 0 | 0 | 1 | 0 | 0 | 0 |
| Atg18   | PtdIns(4)P          | 0 | 0 | 1 | 0 | 0 | 0 |
| Atg18   | PtdIns(4,5)P2       | 0 | 0 | 1 | 0 | 0 | 0 |
| Atg18   | PtdIns(3,4,5)P3     | 0 | 0 | 1 | 0 | 0 | 0 |
| Atg18   | PtdIns              | 0 | 0 | 0 | 0 | 0 | 0 |
| Atg18   | PC                  | 0 | 0 | 0 | 0 | 0 | 0 |
| Atg18   | PE                  | 0 | 0 | 0 | 0 | 0 | 0 |
| Atg18   | DHS-1P              | 0 | 0 | 0 | 0 | 0 | 0 |

|         |                   |   |   |   |   |   |   |
|---------|-------------------|---|---|---|---|---|---|
| Atg18   | Phytoceramide C18 | 0 | 0 | 0 | 0 | 0 | 0 |
| Atg18   | TAG               | 0 | 0 | 0 | 0 | 0 | 0 |
| Atg18   | Dolichol          | 0 | 0 | 0 | 0 | 0 | 0 |
| Hxk1    | PtdIns(3)P        | 0 | 0 | 0 | 0 | 0 | 0 |
| Hxk1    | PtdIns(4)P        | 0 | 0 | 0 | 0 | 0 | 0 |
| Hxk1    | PtdIns(4,5)P2     | 0 | 0 | 0 | 0 | 0 | 0 |
| Hxk1    | PtdIns(3,4,5)P3   | 0 | 0 | 0 | 0 | 0 | 0 |
| Hxk1    | Cardiolipin       | 0 | 0 | 0 | 0 | 0 | 0 |
| Hxk1    | Dolichol          | 0 | 0 | 0 | 0 | 0 | 0 |
| Hxk1    | Ergocalciferol    | 0 | 0 | 0 | 0 | 0 | 0 |
| Erg26   | PtdIns(4)P        | 0 | 0 | 0 | 0 | 0 | 0 |
| Erg26   | PtdIns(4,5)P2     | 0 | 0 | 0 | 0 | 0 | 0 |
| Erg26   | Dihydroceramide   | 0 | 0 | 1 | 0 | 0 | 0 |
| Erg26   | Ceramide          | 0 | 0 | 1 | 0 | 0 | 0 |
| Erg26   | Phytoceramide C18 | 0 | 0 | 1 | 0 | 0 | 0 |
| Erg26   | TAG               | 0 | 0 | 0 | 0 | 0 | 0 |
| Erg26   | Dolichol          | 0 | 0 | 0 | 0 | 0 | 0 |
| Ole1    | PtdIns(3,4,5)P3   | 0 | 0 | 0 | 0 | 0 | 0 |
| Ole1    | PE                | 0 | 0 | 1 | 0 | 0 | 0 |
| Snt2    | PtdIns(3)P        | 0 | 1 | 0 | 0 | 0 | 0 |
| Twf1    | PtdIns(3)P        | 0 | 0 | 0 | 0 | 0 | 0 |
| Twf1    | PtdIns(3,4,5)P3   | 0 | 0 | 0 | 0 | 0 | 0 |
| Twf1    | Phytoceramide C18 | 0 | 0 | 0 | 1 | 0 | 0 |
| Ask10   | PtdIns(4)P        | 0 | 0 | 0 | 0 | 0 | 0 |
| Ask10   | PtdIns(4,5)P2     | 0 | 0 | 0 | 0 | 0 | 0 |
| Ask10   | PtdIns(3,4,5)P3   | 0 | 0 | 0 | 0 | 0 | 0 |
| Ask10   | Cardiolipin       | 0 | 0 | 1 | 0 | 0 | 0 |
| Ask10   | DHS-1P            | 0 | 0 | 1 | 1 | 0 | 0 |
| Mdr1    | PtdIns(3,4,5)P3   | 0 | 0 | 0 | 0 | 0 | 0 |
| Mdr1    | Phytoceramide C18 | 0 | 0 | 0 | 0 | 0 | 0 |
| Mdr1    | TAG               | 0 | 0 | 0 | 0 | 0 | 0 |
| Psd2    | TAG               | 0 | 0 | 0 | 0 | 0 | 0 |
| Psd2    | Dolichol          | 0 | 0 | 0 | 0 | 0 | 0 |
| Pho81   | PtdIns(3)P        | 0 | 0 | 1 | 0 | 0 | 0 |
| Pho81   | PtdIns(4)P        | 0 | 0 | 1 | 0 | 0 | 0 |
| Pho81   | PtdIns(4,5)P2     | 0 | 0 | 1 | 0 | 0 | 0 |
| Pho81   | PtdIns(3,4,5)P3   | 0 | 0 | 1 | 0 | 0 | 0 |
| Pho81   | PE                | 0 | 0 | 0 | 0 | 0 | 0 |
| Pho81   | Phytosphingosine  | 0 | 0 | 0 | 0 | 0 | 0 |
| Yap1802 | PtdIns(4)P        | 0 | 1 | 0 | 0 | 0 | 0 |
| Yap1802 | PtdIns(4,5)P2     | 0 | 1 | 0 | 0 | 0 | 0 |
| Yap1802 | PtdIns            | 0 | 0 | 0 | 0 | 0 | 0 |
| Yap1802 | Cardiolipin       | 0 | 1 | 0 | 0 | 0 | 0 |
| Yap1802 | Ceramide          | 0 | 1 | 1 | 1 | 0 | 0 |
| Yap1802 | TAG               | 0 | 0 | 0 | 0 | 0 | 0 |
| Yap1802 | Dolichol          | 0 | 0 | 0 | 0 | 0 | 0 |
| Yap1802 | Ergocalciferol    | 0 | 0 | 0 | 0 | 0 | 0 |
| Osh7    | PtdIns(4,5)P2     | 1 | 0 | 1 | 0 | 0 | 0 |
| Osh7    | PtdIns(3,4,5)P3   | 1 | 0 | 1 | 0 | 0 | 0 |
| Osh7    | Cardiolipin       | 1 | 0 | 0 | 0 | 0 | 0 |
| Osh7    | PE                | 1 | 0 | 0 | 0 | 0 | 0 |

|         |                                      |   |   |   |   |   |   |
|---------|--------------------------------------|---|---|---|---|---|---|
| Osh3    | PtdIns(4)P                           | 0 | 1 | 0 | 0 | 0 | 0 |
| Osh3    | PtdIns(4,5)P2                        | 0 | 1 | 0 | 0 | 0 | 0 |
| Osh3    | Cardiolipin                          | 0 | 1 | 1 | 0 | 0 | 0 |
| Osh3    | DHS-1P                               | 0 | 1 | 1 | 1 | 0 | 0 |
| Osh3    | Digalactosyl-DAG                     | 0 | 0 | 0 | 0 | 0 | 0 |
| Ypt35   | PtdIns(3)P                           | 0 | 0 | 0 | 0 | 0 | 0 |
| Ypt35   | PtdIns(4)P                           | 0 | 0 | 0 | 0 | 0 | 0 |
| Ypt35   | PtdIns(4,5)P2                        | 0 | 0 | 0 | 0 | 0 | 0 |
| Ypt35   | PtdIns                               | 0 | 0 | 0 | 0 | 0 | 0 |
| Ypt35   | Cardiolipin                          | 0 | 0 | 0 | 0 | 0 | 0 |
| Gga2    | PtdIns                               | 0 | 0 | 0 | 0 | 0 | 0 |
| Gga2    | Cardiolipin                          | 0 | 0 | 0 | 0 | 0 | 0 |
| Gga2    | PE                                   | 0 | 0 | 0 | 0 | 0 | 0 |
| Yhr131c | PtdIns(4)P                           | 1 | 0 | 0 | 0 | 0 | 0 |
| Yhr131c | PtdIns(4,5)P2                        | 1 | 0 | 0 | 0 | 0 | 0 |
| Yhr131c | PtdIns                               | 1 | 0 | 0 | 0 | 0 | 0 |
| Yhr131c | Cardiolipin                          | 1 | 0 | 0 | 0 | 0 | 0 |
| Yhr131c | PE                                   | 1 | 0 | 0 | 0 | 0 | 0 |
| Yhr131c | DHS-1P                               | 1 | 0 | 0 | 0 | 0 | 0 |
| Ysp1    | PtdIns(4)P                           | 0 | 0 | 1 | 0 | 0 | 0 |
| Ysp1    | PtdIns(4,5)P2                        | 0 | 0 | 1 | 0 | 0 | 0 |
| Ysp1    | PtdIns                               | 0 | 0 | 0 | 0 | 0 | 0 |
| Ysp1    | Cardiolipin                          | 0 | 0 | 0 | 0 | 0 | 0 |
| Ysp1    | Sphingosine-1P                       | 0 | 0 | 1 | 1 | 0 | 0 |
| Yap1801 | PtdIns(3)P                           | 0 | 0 | 0 | 0 | 0 | 0 |
| Yap1801 | PtdIns(3,4,5)P3                      | 0 | 0 | 0 | 0 | 0 | 0 |
| Egd2    | PtdIns(3,4,5)P3                      | 1 | 0 | 1 | 0 | 0 | 0 |
| Egd2    | Cardiolipin                          | 1 | 0 | 0 | 0 | 0 | 0 |
| Cbr1    | PE                                   | 0 | 0 | 1 | 0 | 0 | 0 |
| Yrb2    | PtdIns(3)P                           | 0 | 0 | 0 | 0 | 0 | 0 |
| Yrb2    | PtdIns(4)P                           | 0 | 0 | 0 | 0 | 0 | 0 |
| Yrb2    | PtdIns(4,5)P2                        | 0 | 0 | 0 | 0 | 0 | 0 |
| Yrb2    | PtdIns(3,4,5)P3                      | 0 | 0 | 0 | 0 | 0 | 0 |
| Yrb2    | Cardiolipin                          | 0 | 0 | 0 | 0 | 0 | 0 |
| Yrb2    | PE                                   | 0 | 0 | 0 | 0 | 0 | 0 |
| Yrb2    | TAG                                  | 0 | 0 | 0 | 0 | 0 | 0 |
| Slm1    | PtdIns(4)P                           | 0 | 0 | 1 | 0 | 1 | 0 |
| Slm1    | PtdIns(4,5)P2                        | 0 | 1 | 1 | 0 | 1 | 1 |
| Slm1    | PtdIns                               | 0 | 1 | 0 | 0 | 0 | 0 |
| Slm1    | Cardiolipin                          | 0 | 1 | 0 | 0 | 0 | 0 |
| Slm1    | PE                                   | 0 | 1 | 0 | 0 | 0 | 0 |
| Slm1    | DHS-1P                               | 0 | 1 | 0 | 1 | 0 | 1 |
| Yjl145w | PtdIns(4)P                           | 0 | 1 | 0 | 0 | 0 | 0 |
| Yjl145w | PtdIns(4,5)P2                        | 0 | 1 | 0 | 0 | 0 | 0 |
| Yjl145w | PtdIns                               | 0 | 0 | 0 | 0 | 0 | 0 |
| Yjl145w | Cardiolipin                          | 0 | 1 | 0 | 0 | 0 | 0 |
| Yjl145w | PE                                   | 0 | 0 | 0 | 0 | 0 | 0 |
| Yjl145w | TAG                                  | 0 | 0 | 0 | 0 | 0 | 0 |
| Yjl145w | 1,2-DA-3 $\beta$ -galactosylglycerol | 0 | 1 | 0 | 0 | 0 | 0 |
| Yjl145w | Dolichol                             | 0 | 0 | 0 | 0 | 0 | 0 |
| Yjl145w | Ergosterol                           | 0 | 0 | 0 | 0 | 0 | 0 |

|         |                                      |   |   |   |   |   |   |
|---------|--------------------------------------|---|---|---|---|---|---|
| Yjl145w | Ergocalciferol                       | 0 | 0 | 0 | 0 | 0 | 0 |
| Ecm25   | PtdIns(3)P                           | 0 | 0 | 0 | 0 | 0 | 0 |
| Ecm25   | PtdIns(3,4,5)P3                      | 0 | 0 | 0 | 0 | 0 | 1 |
| Ecm25   | PtdIns                               | 0 | 0 | 0 | 0 | 0 | 1 |
| Ecm25   | Cardiolipin                          | 0 | 0 | 0 | 0 | 0 | 0 |
| Ecm25   | PE                                   | 0 | 0 | 0 | 0 | 0 | 0 |
| Ecm25   | Phytosphingosine-1P                  | 0 | 0 | 1 | 0 | 0 | 0 |
| Ecm25   | Sphingosine                          | 0 | 0 | 1 | 0 | 0 | 0 |
| Ecm25   | Sphingosine-1P                       | 0 | 0 | 1 | 0 | 0 | 0 |
| Ecm25   | 1,2-DA-3 $\beta$ -galactosylglycerol | 0 | 0 | 0 | 0 | 0 | 0 |
| Ecm25   | Digalactosyl-DAG                     | 0 | 0 | 0 | 0 | 0 | 0 |
| Ecm25   | FarnesylPP                           | 0 | 0 | 1 | 0 | 0 | 0 |
| Bud4    | PtdIns(3)P                           | 0 | 0 | 0 | 0 | 0 | 0 |
| Bud4    | PtdIns(4)P                           | 0 | 0 | 0 | 0 | 0 | 0 |
| Bud4    | PtdIns(4,5)P2                        | 0 | 0 | 0 | 0 | 0 | 0 |
| Bud4    | PtdIns(3,4,5)P3                      | 0 | 0 | 0 | 0 | 0 | 0 |
| Bud4    | Cardiolipin                          | 0 | 0 | 0 | 0 | 0 | 0 |
| Bud4    | PE                                   | 0 | 0 | 0 | 0 | 0 | 0 |
| Bud4    | DHS-1P                               | 0 | 0 | 0 | 0 | 0 | 0 |
| Bud4    | Phytosphingosine-1P                  | 0 | 0 | 0 | 0 | 0 | 0 |
| Bud4    | Phytoceramide C18                    | 0 | 0 | 0 | 0 | 0 | 0 |
| Bud4    | Sphingosine-1P                       | 0 | 0 | 0 | 0 | 0 | 0 |
| Bud4    | TAG                                  | 0 | 0 | 0 | 0 | 0 | 0 |
| Bud4    | Dolichol                             | 0 | 0 | 0 | 0 | 0 | 0 |
| Str2    | PE                                   | 0 | 0 | 0 | 0 | 0 | 0 |
| Str2    | TAG                                  | 0 | 0 | 0 | 0 | 0 | 0 |
| Ykl088w | PtdIns(4)P                           | 0 | 0 | 0 | 0 | 0 | 0 |
| Ykl088w | PtdIns(4,5)P2                        | 0 | 0 | 0 | 0 | 0 | 0 |
| Ykl088w | Cardiolipin                          | 0 | 0 | 0 | 0 | 0 | 0 |
| Ykl088w | PE                                   | 0 | 0 | 0 | 0 | 0 | 0 |
| Ykl088w | TAG                                  | 0 | 0 | 0 | 0 | 0 | 0 |
| Ykl088w | Dolichol                             | 0 | 0 | 0 | 0 | 0 | 0 |
| Ykl091c | PtdIns(4)P                           | 0 | 0 | 0 | 0 | 0 | 0 |
| Ykl091c | PtdIns(4,5)P2                        | 0 | 0 | 0 | 0 | 0 | 0 |
| Ykl091c | PtdIns(3,4,5)P3                      | 0 | 0 | 0 | 0 | 0 | 0 |
| Ykl091c | PtdIns                               | 0 | 0 | 0 | 0 | 0 | 0 |
| Ykl091c | Cardiolipin                          | 0 | 0 | 0 | 0 | 0 | 0 |
| Ykl091c | DHS-1P                               | 0 | 0 | 0 | 0 | 0 | 0 |
| Ykl091c | Phytosphingosine-1P                  | 0 | 0 | 0 | 0 | 0 | 0 |
| Ykl091c | Palmitoyl-CoA                        | 0 | 0 | 0 | 0 | 0 | 0 |
| Ykl091c | TAG                                  | 0 | 0 | 0 | 0 | 0 | 0 |
| Ykl091c | 1,2-DA-3 $\beta$ -galactosylglycerol | 0 | 0 | 0 | 0 | 0 | 0 |
| Ykl091c | Digalactosyl-DAG                     | 0 | 0 | 0 | 0 | 0 | 0 |
| Ykl091c | 1acyl-glycerol-3P                    | 0 | 0 | 0 | 0 | 0 | 0 |
| Ykl091c | GeranylPP                            | 0 | 0 | 0 | 0 | 0 | 0 |
| Ykl091c | Dolichol                             | 0 | 0 | 0 | 0 | 0 | 0 |
| Apn1    | PtdIns(3,4,5)P3                      | 0 | 0 | 0 | 0 | 0 | 0 |
| Apn1    | PE                                   | 0 | 0 | 0 | 0 | 0 | 0 |
| Apn1    | DHS-1P                               | 0 | 0 | 0 | 0 | 0 | 0 |
| Ypk1    | PtdIns(4)P                           | 0 | 0 | 1 | 0 | 1 | 0 |
| Ypk1    | PtdIns(4,5)P2                        | 0 | 0 | 1 | 0 | 1 | 0 |

|         |                                      |   |   |   |   |   |   |
|---------|--------------------------------------|---|---|---|---|---|---|
| Ypk1    | Cardiolipin                          | 0 | 0 | 0 | 0 | 0 | 0 |
| Ypk1    | Dihydroceramide                      | 0 | 0 | 1 | 1 | 0 | 0 |
| Ypk1    | Phytoceramide C18                    | 0 | 0 | 1 | 1 | 0 | 0 |
| Ypk1    | TAG                                  | 0 | 0 | 0 | 0 | 0 | 0 |
| Ypk1    | Dolichol                             | 0 | 0 | 1 | 0 | 0 | 0 |
| Mst1    | TAG                                  | 0 | 0 | 0 | 0 | 0 | 0 |
| Osh6    | PtdIns(4,5)P2                        | 0 | 0 | 0 | 0 | 0 | 0 |
| Osh6    | PtdIns(3,4,5)P3                      | 0 | 0 | 0 | 0 | 0 | 0 |
| Osh6    | PtdIns                               | 0 | 0 | 0 | 0 | 0 | 0 |
| Osh6    | PC                                   | 0 | 0 | 0 | 0 | 0 | 0 |
| Osh6    | Cardiolipin                          | 0 | 0 | 0 | 0 | 0 | 0 |
| Osh6    | PE                                   | 0 | 0 | 0 | 0 | 0 | 0 |
| Spo14   | PC                                   | 0 | 0 | 1 | 0 | 0 | 0 |
| Spo14   | P-methylethanolamine                 | 0 | 0 | 1 | 0 | 0 | 0 |
| Spo14   | P-dimethylethanolamine               | 0 | 0 | 1 | 0 | 0 | 0 |
| Spo14   | Phytosphingosine                     | 0 | 0 | 0 | 0 | 0 | 0 |
| Spo14   | Dihydroceramide                      | 0 | 0 | 0 | 0 | 0 | 0 |
| Spo14   | Ceramide                             | 0 | 0 | 0 | 0 | 0 | 0 |
| Spo14   | Phytoceramide C8                     | 0 | 0 | 0 | 0 | 0 | 0 |
| Spo14   | Phytoceramide C18                    | 0 | 0 | 0 | 0 | 0 | 0 |
| Spo14   | Sphingosine                          | 0 | 0 | 0 | 0 | 0 | 0 |
| Spo14   | TAG                                  | 0 | 0 | 0 | 0 | 0 | 0 |
| Spo14   | 1,2-DA-3 $\beta$ -galactosylglycerol | 0 | 0 | 0 | 0 | 0 | 0 |
| Spo14   | Digalactosyl-DAG                     | 0 | 0 | 0 | 0 | 0 | 0 |
| Spo14   | Dolichol                             | 0 | 0 | 0 | 0 | 0 | 0 |
| Spo14   | Ergosterol                           | 0 | 0 | 0 | 0 | 0 | 0 |
| Dyn1    | Phytoceramide C18                    | 0 | 0 | 0 | 0 | 0 | 0 |
| Dyn1    | TAG                                  | 0 | 0 | 0 | 0 | 0 | 0 |
| Ykr078w | PtdIns(3)P                           | 1 | 0 | 0 | 0 | 0 | 0 |
| Ykr078w | PtdIns(4)P                           | 1 | 0 | 0 | 0 | 0 | 0 |
| Ykr078w | PtdIns(4,5)P2                        | 1 | 0 | 0 | 0 | 0 | 0 |
| Ykr078w | PtdIns(3,4,5)P3                      | 1 | 0 | 0 | 0 | 0 | 0 |
| Rpf2    | Cardiolipin                          | 0 | 1 | 0 | 0 | 0 | 0 |
| Rpf2    | Phytosphingosine-1P                  | 0 | 1 | 0 | 0 | 0 | 0 |
| Rpf2    | Phytoceramide C18                    | 0 | 0 | 0 | 0 | 0 | 0 |
| Rpf2    | Sphingosine-1P                       | 0 | 0 | 0 | 0 | 0 | 0 |
| Rpf2    | TAG                                  | 0 | 0 | 0 | 0 | 0 | 0 |
| Rpf2    | Dolichol                             | 0 | 1 | 0 | 0 | 0 | 0 |
| Dnm1    | PtdIns(3,4,5)P3                      | 0 | 0 | 1 | 0 | 0 | 0 |
| Dnm1    | PtdIns                               | 0 | 0 | 0 | 0 | 0 | 0 |
| Dnm1    | PC                                   | 0 | 0 | 0 | 0 | 0 | 0 |
| Dnm1    | PE                                   | 0 | 0 | 0 | 0 | 0 | 0 |
| Dnm1    | TAG                                  | 0 | 0 | 0 | 0 | 0 | 0 |
| Dnm1    | Dolichol                             | 0 | 0 | 0 | 0 | 0 | 0 |
| Erg27   | Phytoceramide C18                    | 1 | 0 | 0 | 1 | 0 | 0 |
| Erg27   | TAG                                  | 1 | 0 | 0 | 0 | 0 | 0 |
| Erg27   | Dolichol                             | 1 | 0 | 0 | 0 | 0 | 0 |
| Tfs1    | Phytoceramide C18                    | 0 | 0 | 0 | 0 | 0 | 0 |
| Tfs1    | TAG                                  | 0 | 0 | 0 | 0 | 0 | 0 |
| Tfs1    | Dolichol                             | 0 | 0 | 0 | 0 | 0 | 0 |
| Skg3    | PtdIns(4)P                           | 0 | 0 | 0 | 0 | 0 | 0 |

|       |                                      |   |   |   |   |   |   |
|-------|--------------------------------------|---|---|---|---|---|---|
| Skp3  | PtdIns(4,5)P2                        | 0 | 0 | 0 | 0 | 0 | 0 |
| Skp3  | Cardiolipin                          | 0 | 0 | 0 | 0 | 0 | 0 |
| Atg26 | PtdIns(3,4,5)P3                      | 0 | 0 | 0 | 0 | 0 | 0 |
| Atg26 | DHS-1P                               | 0 | 0 | 0 | 1 | 0 | 0 |
| Atg26 | Ceramide                             | 0 | 0 | 0 | 1 | 0 | 0 |
| Atg26 | TAG                                  | 0 | 0 | 0 | 0 | 0 | 0 |
| Atg26 | Dolichol                             | 0 | 0 | 0 | 0 | 0 | 0 |
| Atg26 | Ergosterol                           | 0 | 0 | 0 | 0 | 0 | 0 |
| Lcb5  | PtdIns(4)P                           | 0 | 0 | 1 | 0 | 0 | 0 |
| Lcb5  | PtdIns(4,5)P2                        | 0 | 0 | 1 | 0 | 0 | 0 |
| Lcb5  | PC                                   | 0 | 0 | 0 | 0 | 0 | 0 |
| Lcb5  | Cardiolipin                          | 0 | 0 | 0 | 0 | 0 | 0 |
| Lcb5  | PE                                   | 0 | 0 | 0 | 0 | 0 | 0 |
| Lcb5  | DHS-1P                               | 0 | 0 | 1 | 0 | 0 | 0 |
| Lcb5  | Phytosphingosine-1P                  | 0 | 0 | 1 | 0 | 0 | 0 |
| Lcb5  | Dihydroceramide                      | 0 | 0 | 1 | 0 | 0 | 0 |
| Lcb5  | Ceramide                             | 0 | 0 | 1 | 0 | 0 | 0 |
| Lcb5  | Phytoceramide C18                    | 0 | 0 | 1 | 0 | 0 | 0 |
| Lcb5  | TAG                                  | 0 | 0 | 0 | 0 | 0 | 0 |
| Lcb5  | Dolichol                             | 0 | 0 | 0 | 0 | 0 | 0 |
| Lcb5  | Ergosterol                           | 0 | 0 | 0 | 0 | 0 | 0 |
| Yhc1  | PtdIns(3)P                           | 0 | 0 | 1 | 0 | 0 | 0 |
| Nup2  | PtdIns(3)P                           | 0 | 0 | 0 | 0 | 0 | 0 |
| Nup2  | PtdIns(4)P                           | 0 | 0 | 0 | 0 | 0 | 0 |
| Nup2  | PtdIns(4,5)P2                        | 0 | 0 | 0 | 0 | 0 | 0 |
| Nup2  | PtdIns(3,4,5)P3                      | 0 | 0 | 0 | 0 | 0 | 0 |
| Nup2  | PtdIns                               | 0 | 0 | 0 | 0 | 0 | 0 |
| Nup2  | Cardiolipin                          | 0 | 0 | 0 | 0 | 0 | 0 |
| Nup2  | PE                                   | 0 | 0 | 0 | 0 | 0 | 0 |
| Nup2  | DHS-1P                               | 0 | 0 | 0 | 0 | 0 | 0 |
| Nup2  | Phytosphingosine-1P                  | 0 | 0 | 0 | 0 | 0 | 0 |
| Nup2  | Sphingosine-1P                       | 0 | 0 | 0 | 0 | 0 | 0 |
| Nup2  | 1,2-DA-3 $\beta$ -galactosylglycerol | 0 | 0 | 0 | 0 | 0 | 0 |
| Sgd1  | Cardiolipin                          | 0 | 0 | 0 | 0 | 0 | 0 |
| Sgd1  | Phytoceramide C18                    | 0 | 0 | 0 | 0 | 0 | 0 |
| Rom2  | PtdIns(3)P                           | 0 | 1 | 1 | 0 | 0 | 0 |
| Rom2  | PtdIns(4)P                           | 0 | 1 | 1 | 0 | 0 | 0 |
| Rom2  | PtdIns(4,5)P2                        | 0 | 1 | 1 | 0 | 0 | 0 |
| Csr1  | PtdIns(4)P                           | 0 | 1 | 0 | 0 | 0 | 0 |
| Csr1  | PtdIns(4,5)P2                        | 0 | 1 | 0 | 0 | 0 | 0 |
| Csr1  | PtdIns                               | 0 | 0 | 0 | 0 | 0 | 0 |
| Csr1  | Cardiolipin                          | 0 | 1 | 0 | 0 | 0 | 0 |
| Csr1  | PE                                   | 0 | 1 | 0 | 0 | 0 | 0 |
| Csr1  | Phytoceramide C18                    | 0 | 0 | 1 | 0 | 0 | 0 |
| Csr1  | TAG                                  | 0 | 0 | 0 | 0 | 0 | 0 |
| Csr1  | Dolichol                             | 0 | 0 | 0 | 0 | 0 | 0 |
| Tus1  | PtdIns(4,5)P2                        | 0 | 1 | 0 | 0 | 0 | 0 |
| Tus1  | Cardiolipin                          | 0 | 1 | 0 | 0 | 0 | 0 |
| Tus1  | DHS-1P                               | 0 | 0 | 0 | 0 | 0 | 0 |
| Tus1  | Phytosphingosine-1P                  | 0 | 0 | 0 | 0 | 0 | 0 |
| Sur7  | TAG                                  | 1 | 0 | 0 | 0 | 0 | 0 |

|         |                                      |   |   |   |   |   |   |
|---------|--------------------------------------|---|---|---|---|---|---|
| Tcb3    | PtdIns(4)P                           | 1 | 0 | 0 | 0 | 0 | 0 |
| Tcb3    | PtdIns                               | 1 | 0 | 0 | 0 | 0 | 0 |
| Ctk3    | Cardiolipin                          | 0 | 0 | 1 | 0 | 0 | 0 |
| Ctk3    | PE                                   | 0 | 0 | 1 | 0 | 0 | 0 |
| Erg13   | TAG                                  | 0 | 0 | 0 | 0 | 0 | 0 |
| Erg13   | Dolichol                             | 0 | 0 | 0 | 0 | 0 | 0 |
| Mvp1    | TAG                                  | 0 | 0 | 0 | 0 | 0 | 0 |
| Erg5    | TAG                                  | 0 | 0 | 0 | 0 | 0 | 0 |
| Erg5    | Digalactosyl-DAG                     | 0 | 0 | 0 | 0 | 0 | 0 |
| Ymr073c | Cardiolipin                          | 0 | 0 | 0 | 0 | 0 | 0 |
| Sec14   | Cardiolipin                          | 1 | 1 | 1 | 0 | 0 | 0 |
| Sec14   | Phytoceramide C18                    | 1 | 0 | 0 | 1 | 0 | 0 |
| Sec14   | TAG                                  | 1 | 0 | 0 | 0 | 0 | 0 |
| Sec14   | Dolichol                             | 1 | 0 | 0 | 0 | 0 | 0 |
| Ypk2    | PtdIns(4,5)P2                        | 0 | 0 | 1 | 0 | 0 | 0 |
| Ypk2    | Cardiolipin                          | 0 | 0 | 0 | 0 | 0 | 0 |
| Ypk2    | DHS-1P                               | 0 | 0 | 0 | 0 | 0 | 0 |
| Sas2    | PtdIns(3)P                           | 0 | 0 | 0 | 0 | 0 | 0 |
| Erg12   | TAG                                  | 0 | 0 | 0 | 0 | 0 | 0 |
| Erg12   | Dolichol                             | 0 | 0 | 1 | 0 | 0 | 0 |
| Scs7    | PtdIns                               | 0 | 0 | 1 | 0 | 0 | 0 |
| Scs7    | Cardiolipin                          | 0 | 0 | 1 | 0 | 0 | 0 |
| Pse1    | PtdIns(3)P                           | 0 | 0 | 1 | 0 | 0 | 0 |
| Pse1    | PtdIns                               | 0 | 0 | 0 | 0 | 0 | 0 |
| Pse1    | TAG                                  | 0 | 0 | 0 | 0 | 0 | 0 |
| Slm2    | PtdIns(4,5)P2                        | 0 | 0 | 0 | 0 | 0 | 0 |
| Slm2    | DHS-1P                               | 0 | 0 | 0 | 0 | 0 | 0 |
| Tcb2    | PtdIns(4)P                           | 0 | 0 | 0 | 0 | 0 | 0 |
| Tcb2    | PtdIns(4,5)P2                        | 0 | 0 | 0 | 0 | 0 | 0 |
| Tcb2    | DHS-1P                               | 0 | 0 | 0 | 0 | 0 | 0 |
| Far11   | Phytoceramide C18                    | 0 | 0 | 0 | 0 | 0 | 0 |
| Far11   | TAG                                  | 0 | 0 | 0 | 0 | 0 | 0 |
| Fpr1    | Cardiolipin                          | 0 | 0 | 0 | 0 | 0 | 0 |
| Ynl144c | PtdIns(4)P                           | 1 | 0 | 0 | 0 | 0 | 0 |
| Ynl144c | PtdIns(4,5)P2                        | 1 | 0 | 0 | 0 | 0 | 0 |
| Ynl144c | PtdIns(3,4,5)P3                      | 1 | 0 | 0 | 0 | 0 | 0 |
| Ynl144c | PE                                   | 1 | 0 | 0 | 0 | 0 | 0 |
| Psy2    | TAG                                  | 0 | 0 | 0 | 0 | 0 | 0 |
| Pdr16   | PC                                   | 0 | 0 | 0 | 0 | 0 | 0 |
| Pdr16   | TAG                                  | 0 | 0 | 0 | 0 | 0 | 0 |
| Pdr16   | 1,2-DA-3 $\beta$ -galactosylglycerol | 0 | 0 | 0 | 0 | 0 | 0 |
| Pdr16   | Dolichol                             | 0 | 0 | 1 | 0 | 0 | 0 |
| Pdr16   | Ergosterol                           | 0 | 0 | 1 | 0 | 0 | 0 |
| Sla2    | PtdIns(4,5)P2                        | 0 | 0 | 1 | 0 | 0 | 0 |
| Sla2    | DHS-1P                               | 0 | 1 | 0 | 1 | 0 | 0 |
| Sla2    | Phytosphingosine-1P                  | 0 | 0 | 0 | 1 | 0 | 0 |
| Sla2    | Phytoceramide C18                    | 0 | 0 | 0 | 1 | 0 | 0 |
| Pdr17   | PtdIns(4)P                           | 0 | 0 | 0 | 0 | 0 | 0 |
| Pdr17   | PtdIns(4,5)P2                        | 0 | 0 | 0 | 0 | 0 | 0 |
| Pdr17   | PtdIns                               | 0 | 0 | 0 | 0 | 0 | 0 |
| Pdr17   | Cardiolipin                          | 0 | 0 | 0 | 0 | 0 | 0 |

|        |                     |   |   |   |   |   |   |
|--------|---------------------|---|---|---|---|---|---|
| Pdr17  | PE                  | 0 | 0 | 0 | 0 | 0 | 0 |
| Pdr17  | DHS-1P              | 0 | 0 | 1 | 0 | 0 | 0 |
| Caf120 | PtdIns(3)P          | 0 | 0 | 0 | 0 | 0 | 0 |
| Caf120 | PtdIns(4)P          | 0 | 0 | 0 | 0 | 0 | 0 |
| Caf120 | PtdIns(4,5)P2       | 0 | 0 | 0 | 0 | 0 | 0 |
| Caf120 | DHS-1P              | 0 | 0 | 0 | 0 | 0 | 0 |
| Caf120 | Phytosphingosine-1P | 0 | 0 | 0 | 0 | 0 | 0 |
| Cla4   | PtdIns(4)P          | 1 | 0 | 1 | 0 | 0 | 0 |
| Cla4   | PtdIns(4,5)P2       | 1 | 0 | 1 | 0 | 0 | 0 |
| Cla4   | PtdIns(3,4,5)P3     | 1 | 0 | 1 | 0 | 0 | 0 |
| Cla4   | PtdIns              | 1 | 0 | 0 | 0 | 0 | 0 |
| Cla4   | Cardiolipin         | 1 | 0 | 0 | 0 | 0 | 0 |
| Cla4   | DHS-1P              | 1 | 0 | 0 | 0 | 0 | 0 |
| Cla4   | Phytosphingosine-1P | 1 | 0 | 0 | 0 | 0 | 0 |
| Vps27  | Phytoceramide C18   | 0 | 0 | 1 | 0 | 0 | 0 |
| Ira2   | PtdIns(3)P          | 0 | 0 | 1 | 0 | 0 | 0 |
| Ira2   | PtdIns(3,4,5)P3     | 0 | 0 | 1 | 0 | 0 | 1 |
| Ira2   | TAG                 | 0 | 0 | 1 | 0 | 0 | 0 |
| Pkh2   | PtdIns(4)P          | 0 | 0 | 1 | 0 | 1 | 1 |
| Pkh2   | PtdIns(4,5)P2       | 0 | 0 | 1 | 0 | 1 | 1 |
| Pkh2   | PtdIns              | 0 | 0 | 0 | 0 | 0 | 1 |
| Pkh2   | DHS-1P              | 0 | 0 | 1 | 0 | 0 | 0 |
| Cdc33  | PtdIns(4)P          | 0 | 0 | 0 | 0 | 0 | 0 |
| Cdc33  | PtdIns(4,5)P2       | 0 | 0 | 0 | 0 | 0 | 0 |
| Cdc33  | Cardiolipin         | 0 | 0 | 0 | 0 | 0 | 0 |
| Vps17  | TAG                 | 0 | 0 | 0 | 0 | 0 | 0 |
| Lcb4   | Phytoceramide C18   | 0 | 0 | 1 | 0 | 0 | 0 |
| Las17  | PtdIns(3,4,5)P3     | 0 | 0 | 1 | 0 | 1 | 1 |
| Las17  | Phytosphingosine-1P | 0 | 0 | 0 | 1 | 0 | 0 |
| Las17  | Sphingosine-1P      | 0 | 0 | 0 | 1 | 0 | 0 |
| Her1   | PtdIns(3)P          | 1 | 1 | 0 | 0 | 0 | 0 |
| Her1   | PtdIns(4)P          | 1 | 1 | 0 | 0 | 0 | 0 |
| Her1   | PtdIns(4,5)P2       | 1 | 1 | 0 | 0 | 0 | 0 |
| Her1   | PtdIns(3,4,5)P3     | 1 | 1 | 0 | 0 | 0 | 0 |
| Her1   | Cardiolipin         | 1 | 1 | 0 | 0 | 0 | 0 |
| Her1   | Phytosphingosine-1P | 1 | 0 | 0 | 0 | 0 | 0 |
| Her1   | Sphingosine-1P      | 1 | 0 | 0 | 0 | 0 | 0 |
| Her1   | Dolichol            | 1 | 0 | 0 | 0 | 0 | 0 |
| Sec63  | PtdIns(3)P          | 1 | 1 | 1 | 0 | 0 | 0 |
| Sec63  | PtdIns(3,4,5)P3     | 1 | 0 | 1 | 0 | 0 | 0 |
| Sec63  | Phytoceramide C18   | 1 | 0 | 1 | 0 | 0 | 0 |
| Sec63  | TAG                 | 1 | 0 | 0 | 0 | 0 | 0 |
| Sec63  | Dolichol            | 1 | 1 | 1 | 0 | 0 | 0 |
| Lsp1   | PtdIns(4)P          | 1 | 1 | 0 | 0 | 0 | 0 |
| Lsp1   | PtdIns(4,5)P2       | 1 | 1 | 0 | 0 | 0 | 0 |
| Lsp1   | PtdIns(3,4,5)P3     | 1 | 1 | 0 | 0 | 0 | 0 |
| Lsp1   | PtdIns              | 1 | 0 | 0 | 0 | 0 | 0 |
| Lsp1   | Cardiolipin         | 1 | 1 | 0 | 0 | 0 | 0 |
| Erg10  | Phytoceramide C18   | 0 | 0 | 1 | 0 | 0 | 0 |
| Erg10  | TAG                 | 0 | 0 | 0 | 0 | 0 | 0 |
| Kes1   | PtdIns(3)P          | 0 | 1 | 1 | 0 | 0 | 0 |

|         |                 |   |   |   |   |   |   |
|---------|-----------------|---|---|---|---|---|---|
| Kes1    | PtdIns(4)P      | 0 | 1 | 1 | 0 | 0 | 0 |
| Kes1    | PtdIns(4,5)P2   | 0 | 1 | 1 | 0 | 0 | 0 |
| Kes1    | PtdIns(3,4,5)P3 | 0 | 1 | 1 | 0 | 0 | 0 |
| Kes1    | PtdIns          | 0 | 0 | 1 | 0 | 0 | 0 |
| Ypl150w | PtdIns(3)P      | 1 | 0 | 0 | 0 | 0 | 0 |
| Ypl150w | PtdIns(4,5)P2   | 1 | 0 | 0 | 0 | 0 | 0 |
| Ypl150w | PtdIns(3,4,5)P3 | 1 | 0 | 0 | 0 | 0 | 0 |
| Ypl150w | Cardiolipin     | 1 | 0 | 0 | 0 | 0 | 0 |
| Mcm4    | Cardiolipin     | 0 | 0 | 0 | 0 | 0 | 0 |
| Mcm4    | Dolichol        | 0 | 0 | 0 | 0 | 0 | 0 |
| Ypr091c | PtdIns(4,5)P2   | 0 | 1 | 1 | 0 | 0 | 0 |
| Ypr091c | PtdIns(3,4,5)P3 | 0 | 1 | 1 | 0 | 0 | 0 |
| Ypr091c | PC              | 0 | 0 | 0 | 0 | 0 | 0 |
| Ypr091c | PE              | 0 | 1 | 0 | 0 | 0 | 0 |
| Ypr091c | DHS-1P          | 0 | 1 | 0 | 0 | 0 | 0 |
| Ypr091c | Ceramide        | 0 | 0 | 0 | 0 | 0 | 0 |
| Ypr091c | TAG             | 0 | 0 | 0 | 0 | 0 | 0 |
| Ypr091c | Dolichol        | 0 | 0 | 1 | 0 | 0 | 0 |
| Ypr091c | Ergosterol      | 0 | 0 | 1 | 0 | 0 | 0 |
| Ypr097w | PtdIns(4,5)P2   | 1 | 0 | 0 | 0 | 0 | 0 |
| Ypr097w | TAG             | 1 | 0 | 0 | 0 | 0 | 0 |
| Ypr097w | Dolichol        | 1 | 0 | 0 | 0 | 0 | 0 |
| Ypr174c | PtdIns(3)P      | 0 | 0 | 0 | 0 | 0 | 0 |
| Ypr174c | PtdIns(3,4,5)P3 | 0 | 0 | 0 | 0 | 0 | 0 |
| Ypr174c | PtdIns          | 0 | 0 | 0 | 0 | 0 | 0 |
| Ypr174c | PE              | 0 | 0 | 0 | 0 | 0 | 0 |
